# Supplementary material
Source: publisher figshare collection journal article supplement (https://tandf.figshare.com/articles/dataset/_/25243417)

File: BB-III-94-FABP  
Sample: BILQUEES/DR.KHALID  
Instrument: JEOL JMS-600H  
Inlet: Direct Probe

Date Run: 08-28-2015 (Time Run: 12:40:14)

Run By: HEJ (ICCBS)

Ionization mode: FAB+

Scan: 2

R.T.: .1

#Ions: 678

Base: m/z 185; 95.5%FS TIC: 2972762

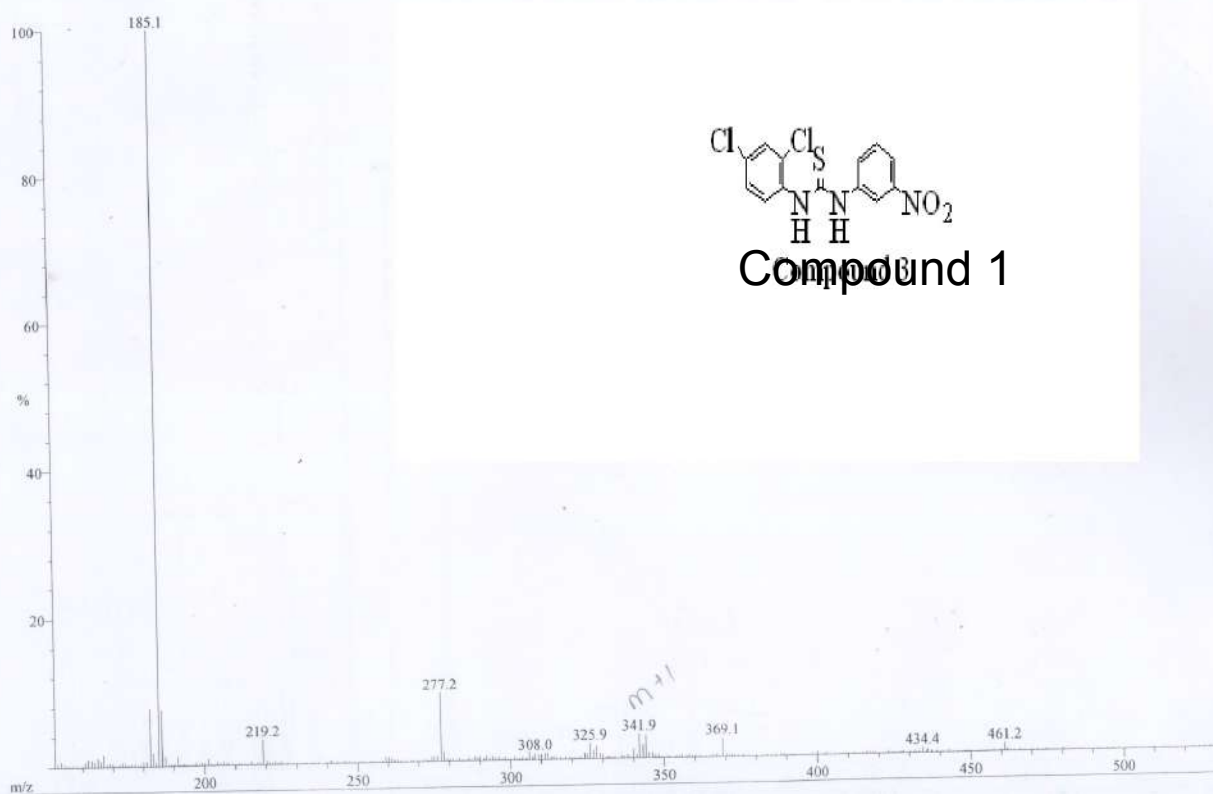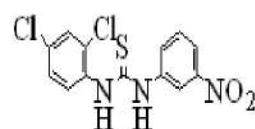

Compound 1

File Name : d:\mswin\data\bbiii-83.mss  
Creation Date/Time : 07.05.15 at 11:37:58  
File Type : Lo-Res Mass Data (Centroid)  
File Source : Acquired on MASPEC system [msw/A091]  
File Title : BILQUEES BANO / DR. KHALID  
Operator : Barkat Ali  
Instrument : MAT312

SCAN GRAPH. Flagging=M/z.

Scan 5-3:30. Entries=124. 100% Int=155557.

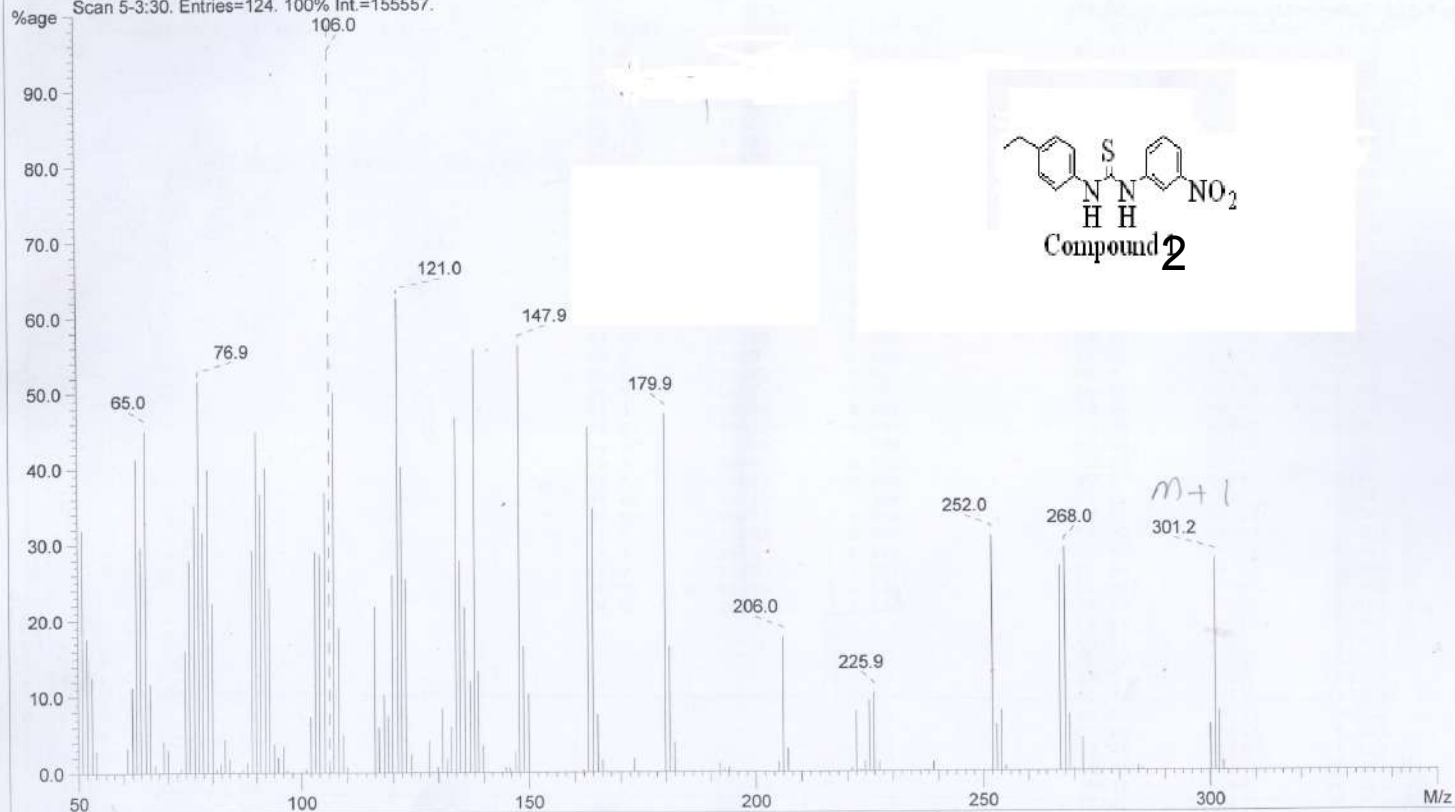

File: BB-III-90  
Sample: BILQUEES BANO/DR. KHALID  
Instrument: JEOL MSRoute  
Inlet: My Inlet

Date Run: 04-10-2015 (Time Run: 11:12:31)

Ionization mode: EI+

Scan: 25  
Base: m/z 127; 77%FS TIC: 10542482

R.T.: 2.13

#Ions: 178

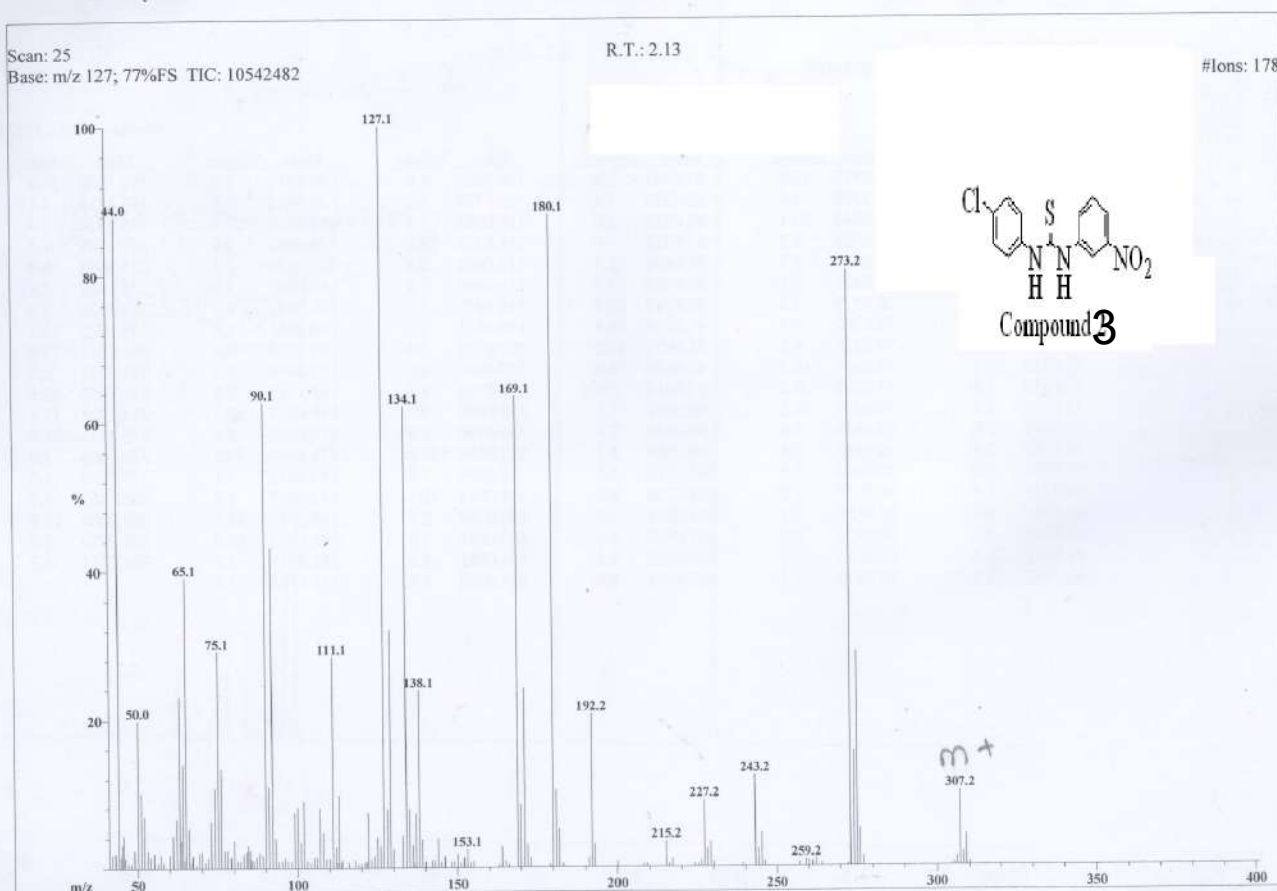

File: BB-III-95-FABP  
Sample: BILQUEES/DR.KHALID  
Instrument: JEOL JMS-600H  
Inlet: Direct Probe

Date Run: 08-28-2015 (Time Run: 12:17:11)

Ionization mode: FAB+

Run By: HEJ (ICCBS)

Scan: 5

R.T.: .37

#Ions: 501

Base: m/z 185; 100%FS TIC: 2237995

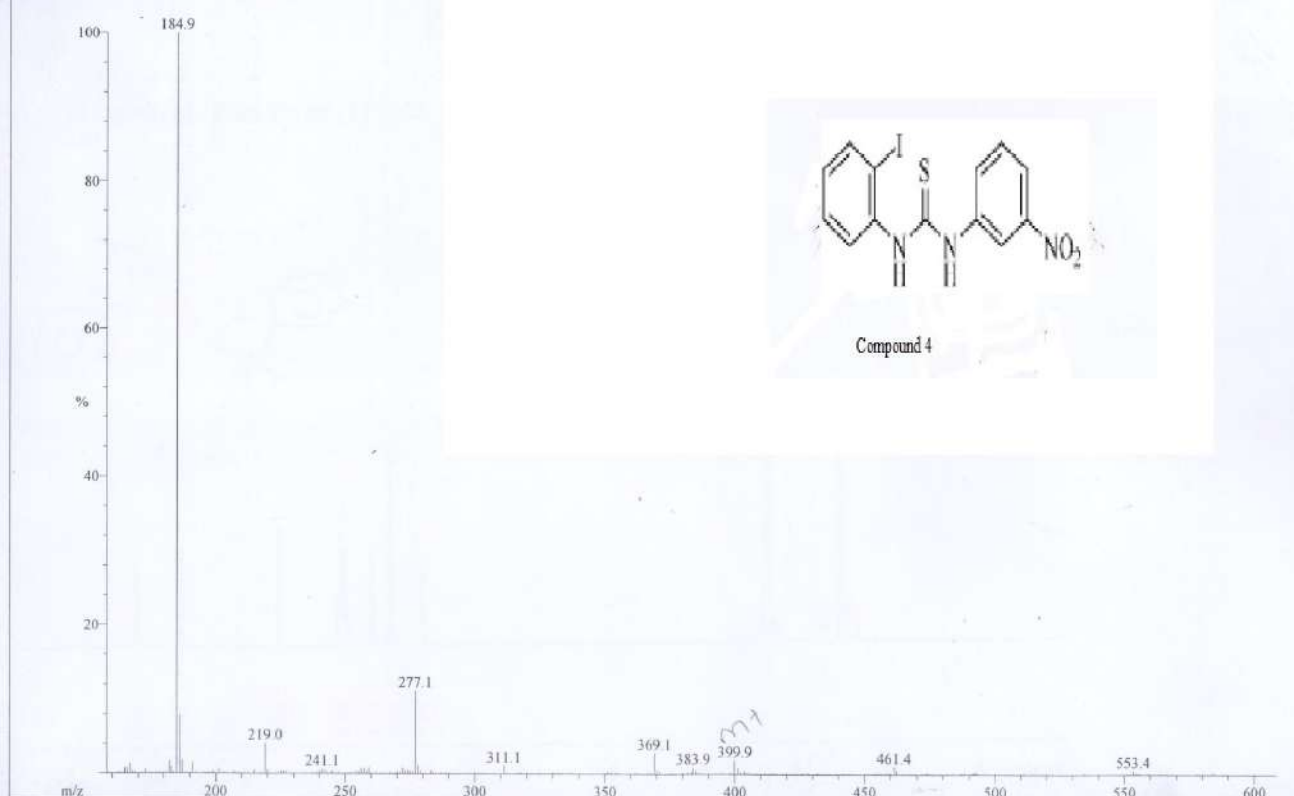

File: BB-III-96-FABP  
Sample: BILQUEES/DR.KHALID  
Instrument: JEOL JMS-600H  
Inlet: Direct Probe

Date Run: 08-28-2015 (Time Run: 12:00:42)

Ionization mode: FAB+

Run By: HEJ (ICCBS)

Scan: 9

R.T.: .72

Base: m/z 185; 100%FS TIC: 3758794

#Ions: 790

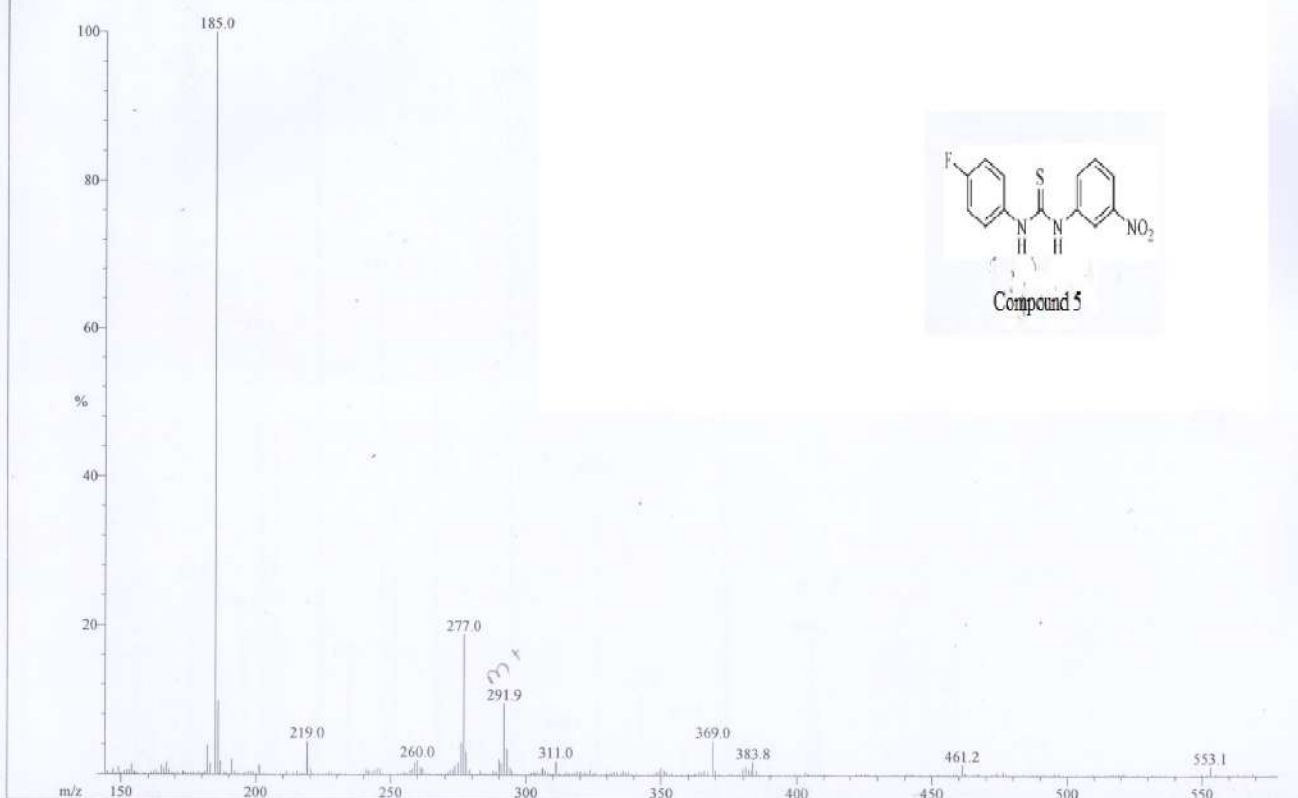

File: BB-IV-111  
Sample: BILQUESS/DR. KHALID  
Instrument: JEOL MSRoute  
Inlet: My Inlet

Date Run: 05-25-2015 (Time Run: 16:25:49)

Ionization mode: EI+

Scan: 11

Base: m/z 359; 68.9%FS TIC: 8953804

R.T.: .9

#Ions: 266

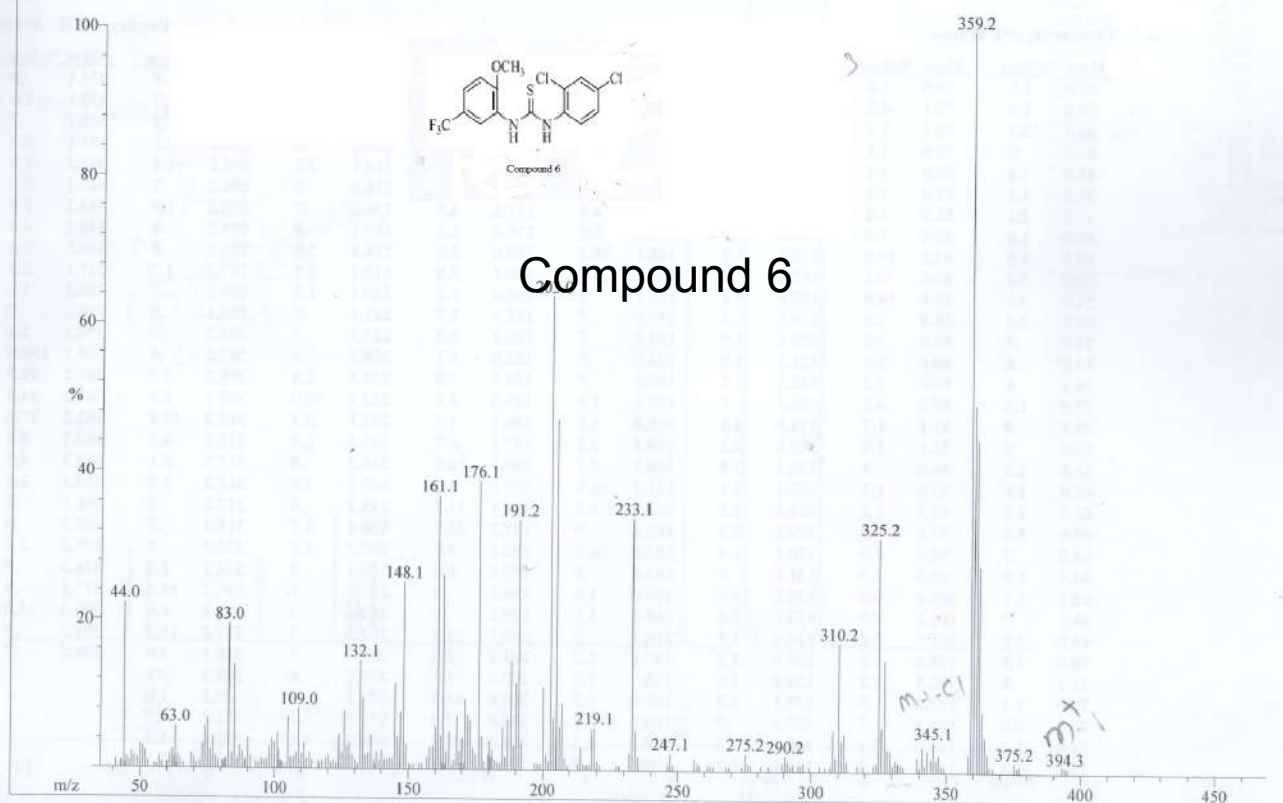

File: BB-IV-4-FABP  
Sample: BILQUEES/DR.KHALID  
Instrument: JEOL JMS-600H  
Inlet: Direct Probe

Date Run: 08-28-2015 (Time Run: 14:55:01)

Ionization mode: FAB+

Run By: HEJ (ICCBS)

Scan: 5

R.T.: .37

Base: m/z 185; 45.5%FS TIC: 2945512

#Ions: 616

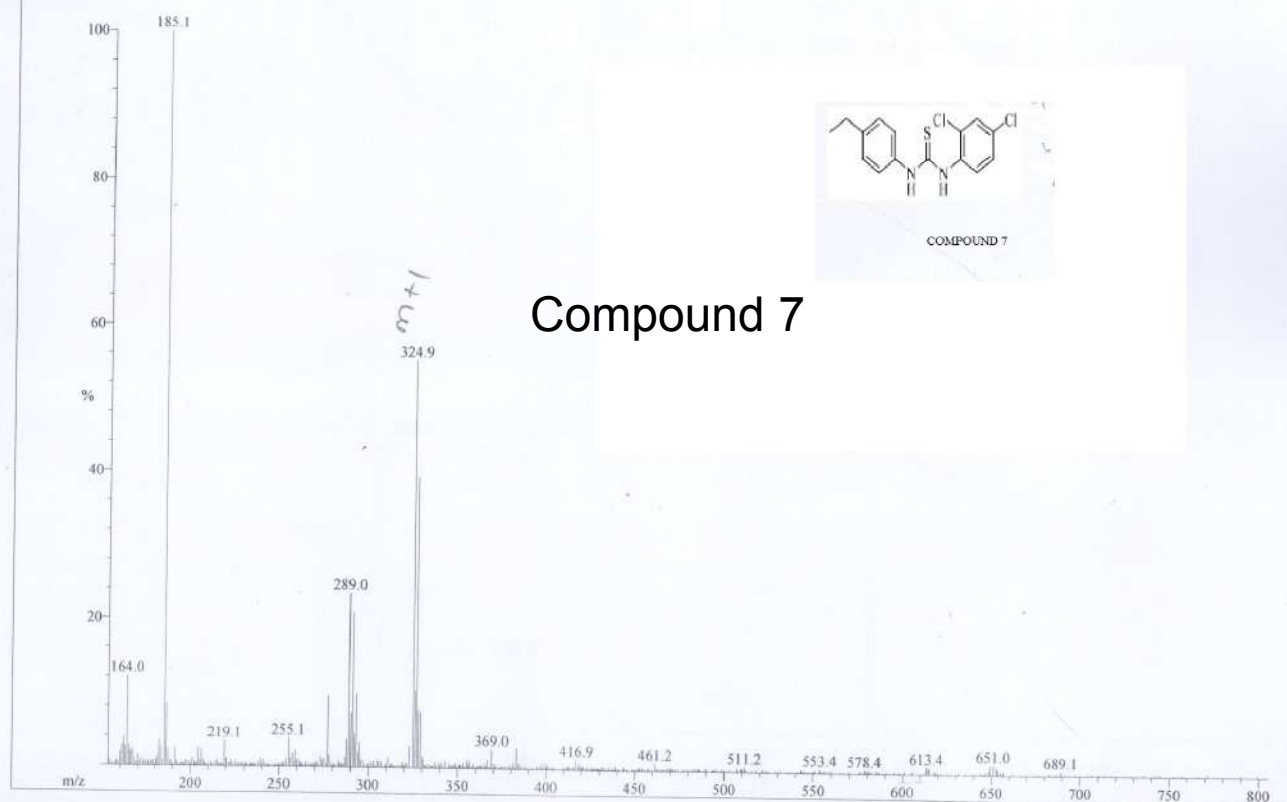

Compound 7

File: BB-IV-6-FABP  
Sample: BILQUEES/DR.KHALID  
Instrument: JEOL JMS-600H  
Inlet: Direct Probe

Date Run: 08-28-2015 (Time Run: 10:37:37)

Ionization mode: FAB+

Run By: HEJ (ICCBS)

Scan: 3

Base: m/z 185; 100%FS TIC: 3775338

R.T.: .18

#Ions: 694

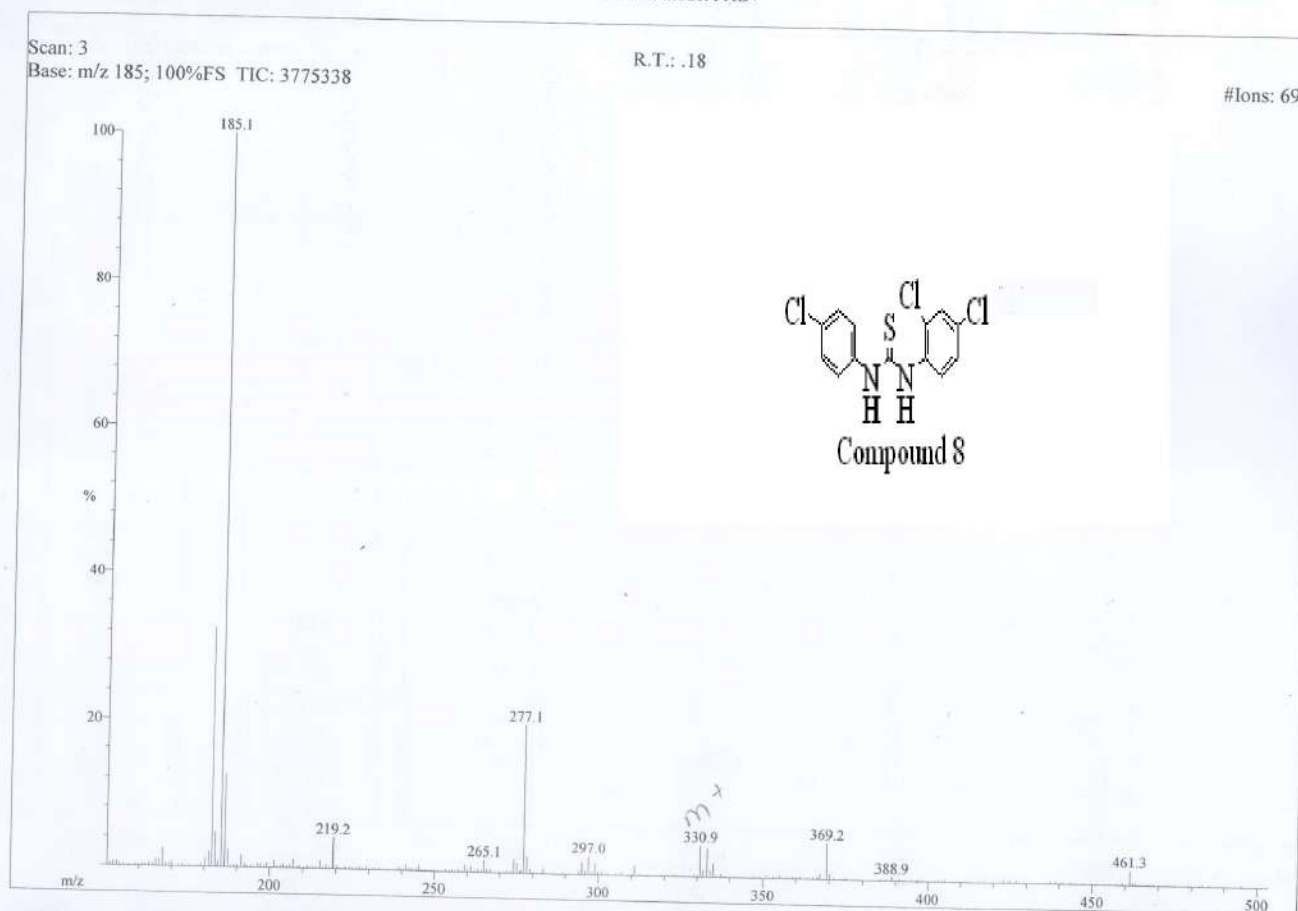



File: BB-IV-8-FABP Date Run: 08-29-2015 (Time Run: 15:30:08)  
Sample: BILQUEES / DR. KHALID FAB ANALYSIS +/-  
Instrument: JEOL JMS-600H  
Inlet: Direct Probe

Run By: HEJ (ICCBS)

Ionization mode: FAB+

Scan: 4

R.T.: .27

Base: m/z 185; 61.8%FS TIC: 1371357

#Ions: 355

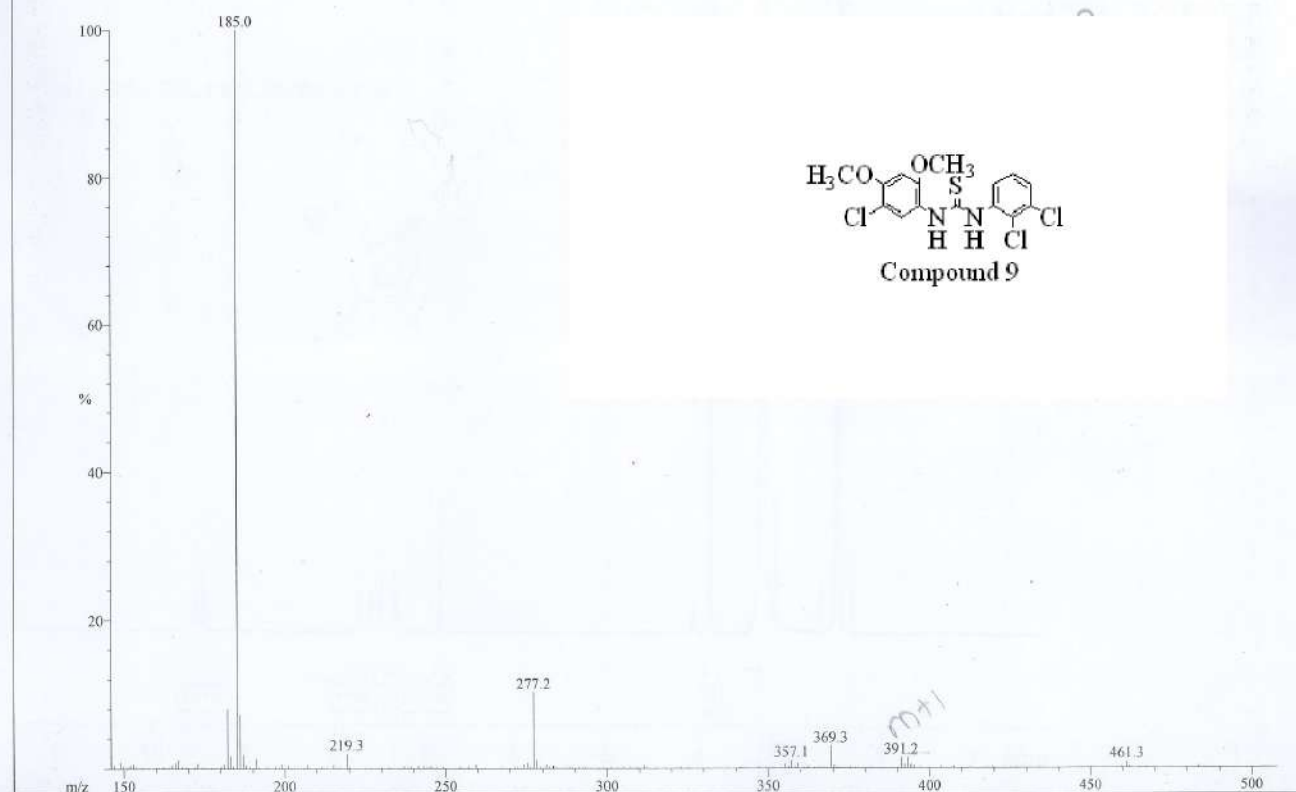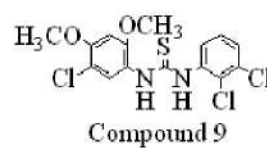

File: BB-IV -9-FABP

Date Run: 08-29-2015 (Time Run: 15:33:02)

Sample: BILQUEES / DR. KHALID FAB ANALYSIS +/-

Instrument: JEOL JMS-600H

Inlet: Direct Probe

Ionization mode: FAB+

Run By: HEJ (ICCBS)

Scan: 1

R.T.: 0

Base: m/z 185; 21.9%FS TIC: 540082

#Ions: 238

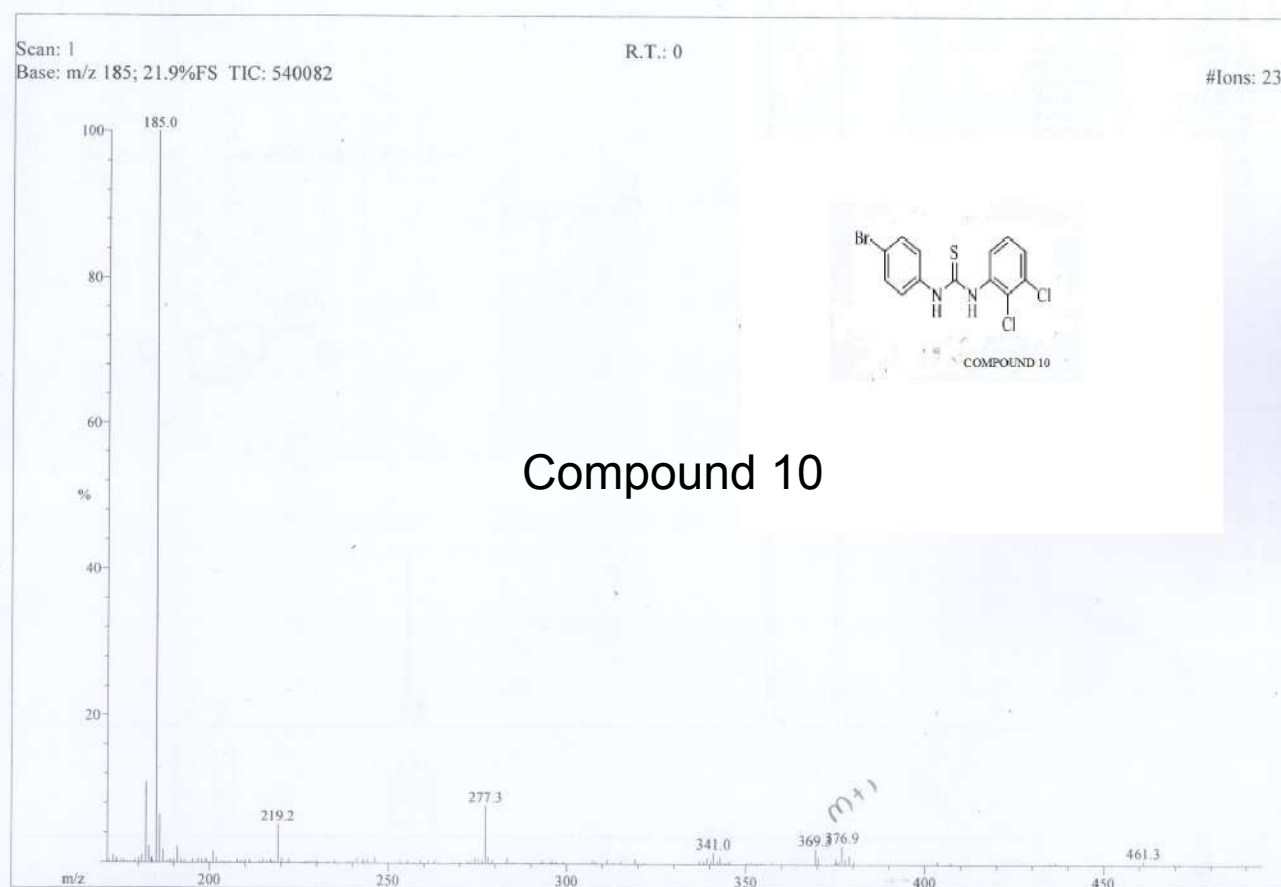

File: BB-IV-13-FABP

Date Run: 08-29-2015 (Time Run: 12:32:26)

Sample: BILQUEES / DR. KHALID FAB ANALYSIS +/-

Instrument: JEOL JMS-600H

Run By: HEJ (ICCBS)

Inlet: Direct Probe

Ionization mode: FAB+

Scan: 5

R.T.: .37

#Ions: 444

Base: m/z 185; 27.5%FS TIC: 1086404

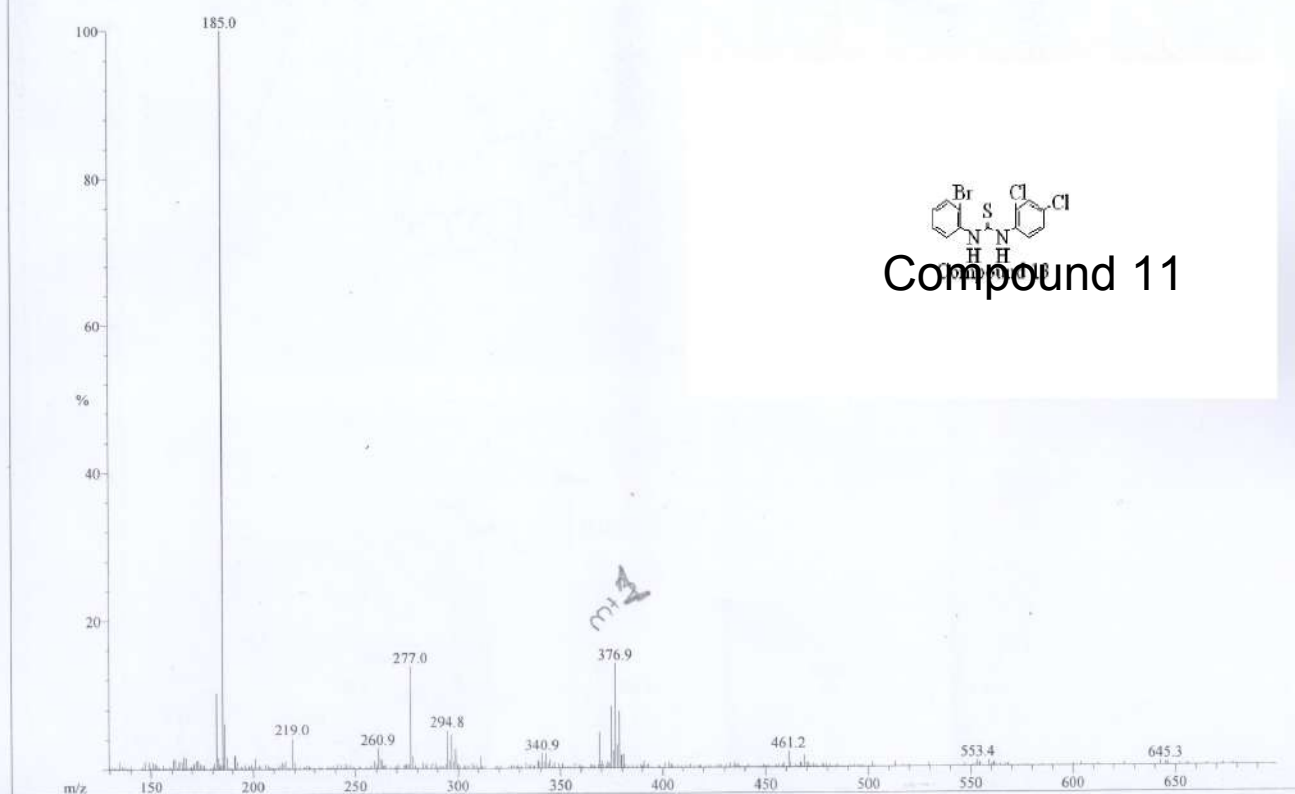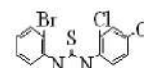

Compound 11

File: BB-IV-10  
Sample: BILQUESS /DR. KHALID  
Instrument: JEOL MSRoute  
Inlet: My Inlet

Date Run: 05-25-2015 (Time Run: 16:11:46)

Ionization mode: EI+

Scan: 21

Base: m/z 203; 86.8%FS TIC: 14834738

R.T.: 1.78

#Ions: 315

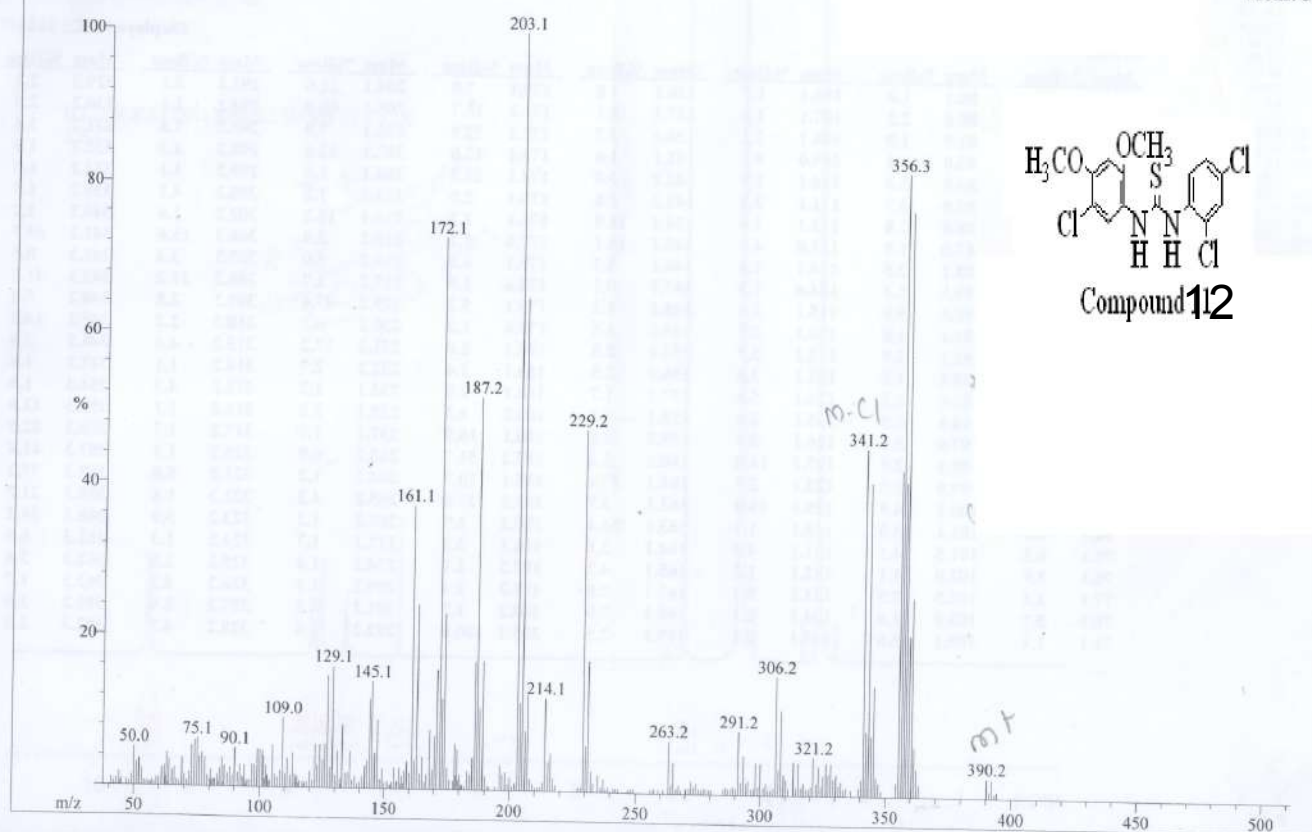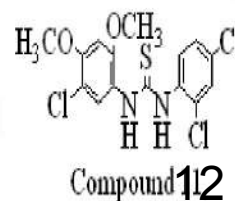

File: BB-IV-11 (over)  
Sample: BILQUEES /DR. KHALID  
Instrument: JEOL MSRoute  
Inlet: My Inlet

Date Run: 05-28-2015 (Time Run: 16:07:39)

Ionization mode: EI+

Scan: 18  
Base: m/z 342; 52.8%FS TIC: 8441226

R.T.: 1.52

#Ions: 231

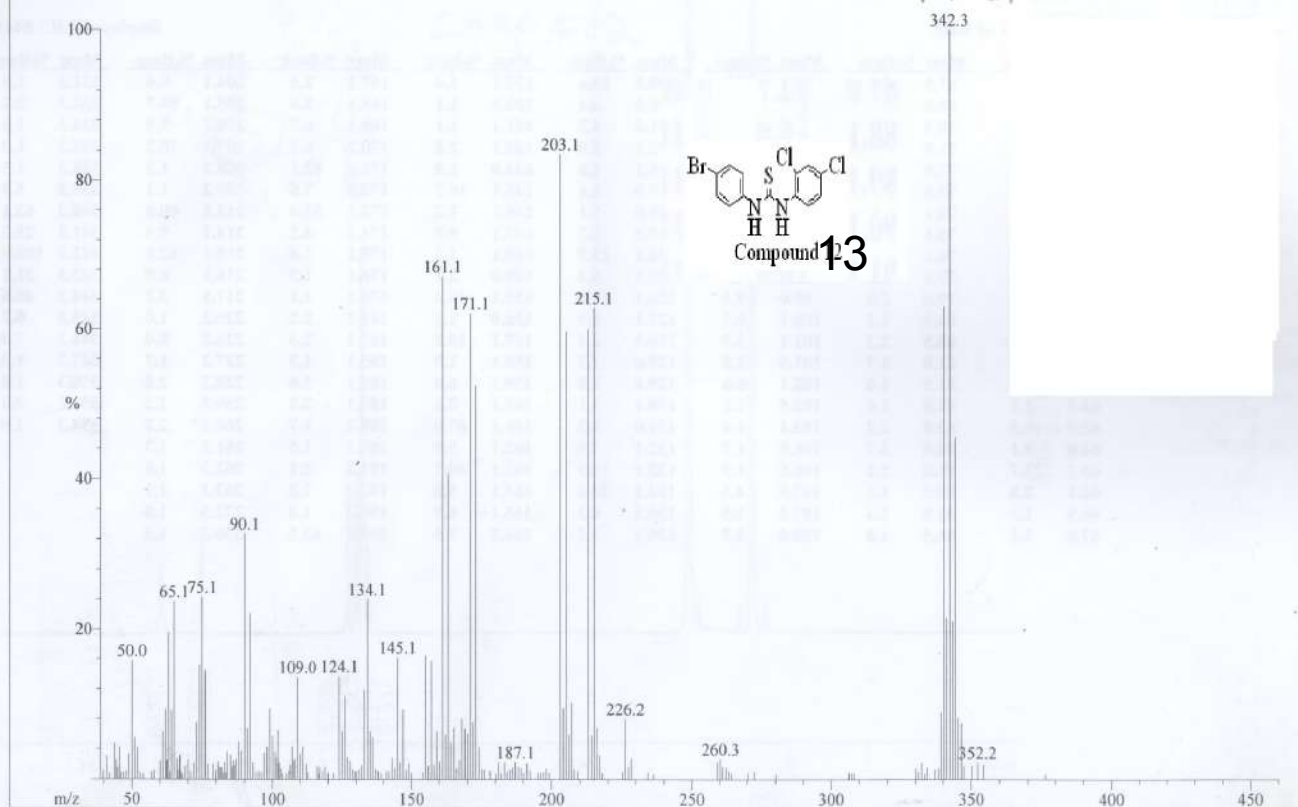

File: BB-IV-14-FABP  
 Sample: BILQUEES/DR.KHALID  
 Instrument: JEOL JMS-600H  
 Inlet: Direct Probe

Date Run: 08-28-2015 (Time Run: 10:41:40)

Ionization mode: FAB+

Run By: HEJ (ICCBS)

Scan: 9

Base: m/z 185; 100%FS TIC: 2491433

R.T.: .72

#Ions: 519

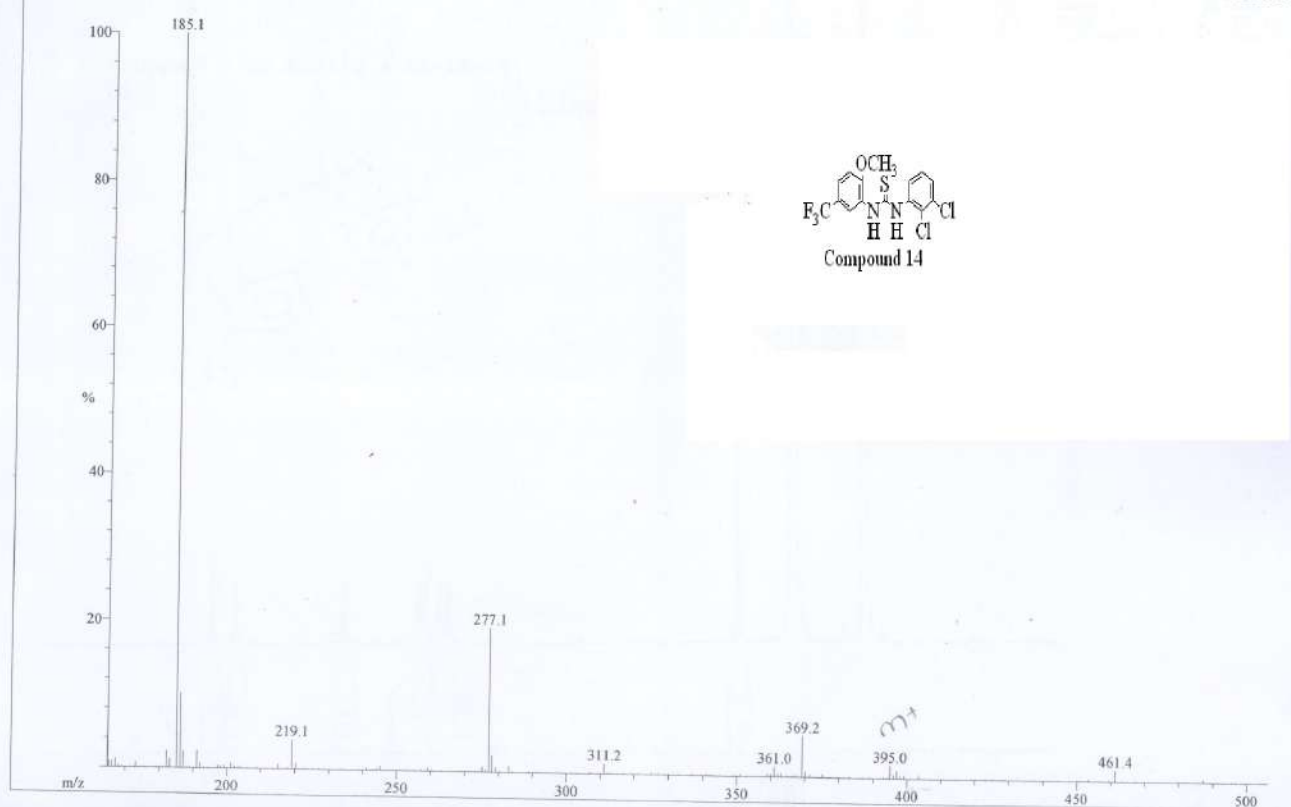

File: BB-IV-16-FABP  
Sample: BILQUEES/DR.KHALID  
Instrument: JEOL JMS-600H  
Inlet: Direct Probe

Date Run: 08-28-2015 (Time Run: 12:47:40)

Ionization mode: FAB+

Run By: HEJ (ICCBS)

Scan: 7

R.T.: .53

Base: m/z 185; 35.3%FS TIC: 1999225

#Ions: 615

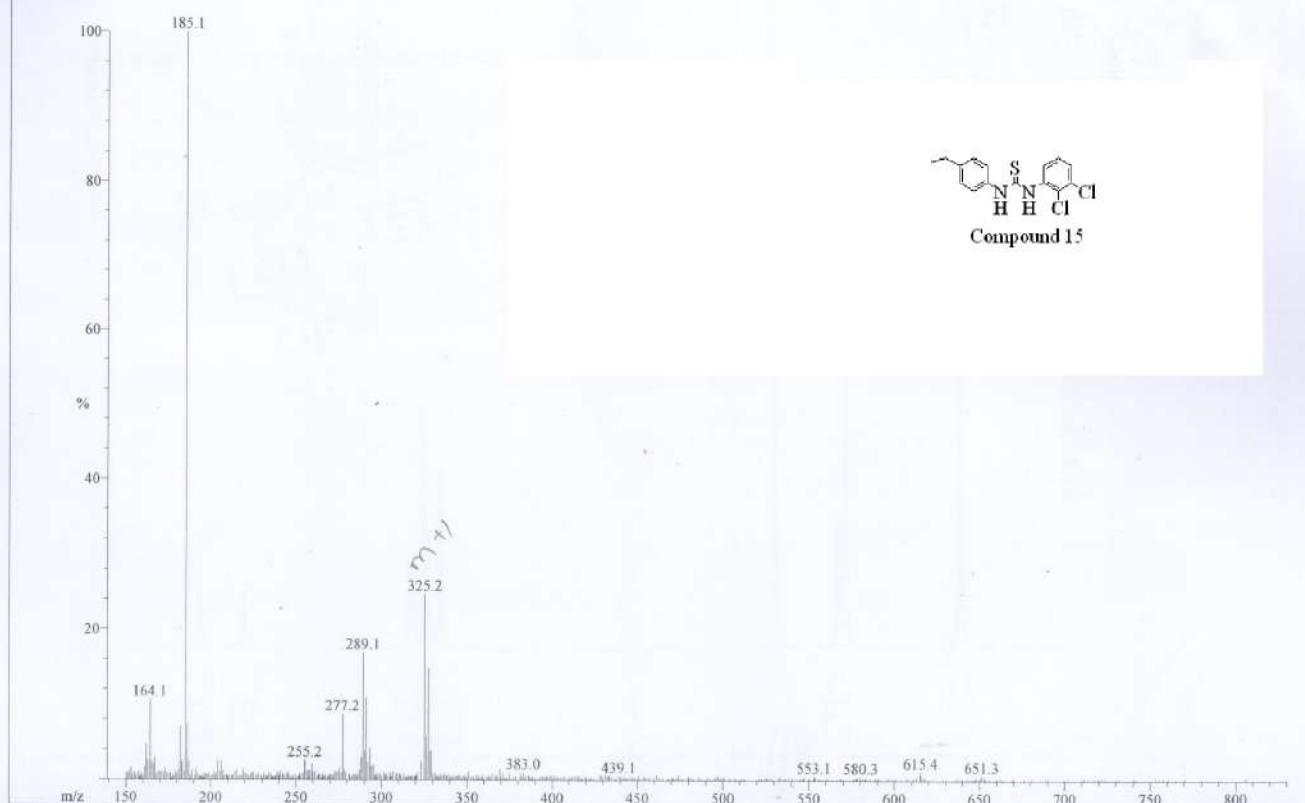

File: BB-IV-17-FABP  
Sample: BILQUEES/DR.KHALID  
Instrument: JEOL JMS-600H  
Inlet: Direct Probe

Date Run: 08-28-2015 (Time Run: 10:17:36)

Ionization mode: FAB+

Run By: HEJ (ICCBS)

Scan: 3

R.T.: .18

Base: m/z 185; 100%FS TIC: 2805704

#Ions: 472

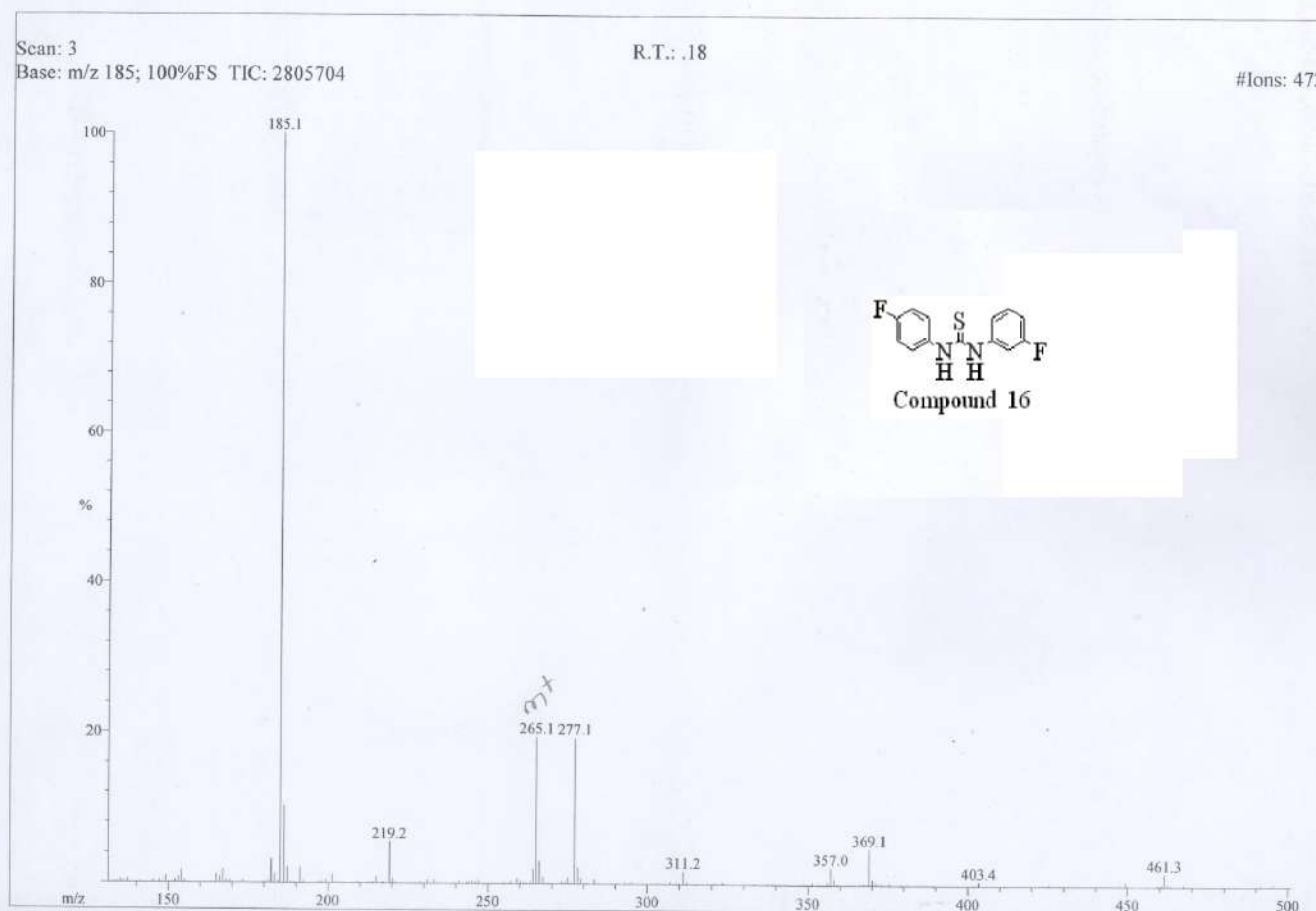



File Name:  
Injection Date:

File: BB-IV-19-FABP

Date Run: 08-29-2015 (Time Run: 12:45:45)

Sample: BILQUEES / DR. KHALID FAB ANALYSIS +/-

Instrument: JEOL JMS-600H

Inlet: Direct Probe

Ionization mode: FAB+

Run By: HEJ (ICCBS)

Scan: 15

R.T.: 1.23

Base: m/z 185; 33.6%FS TIC: 1318862

#Ions: 514

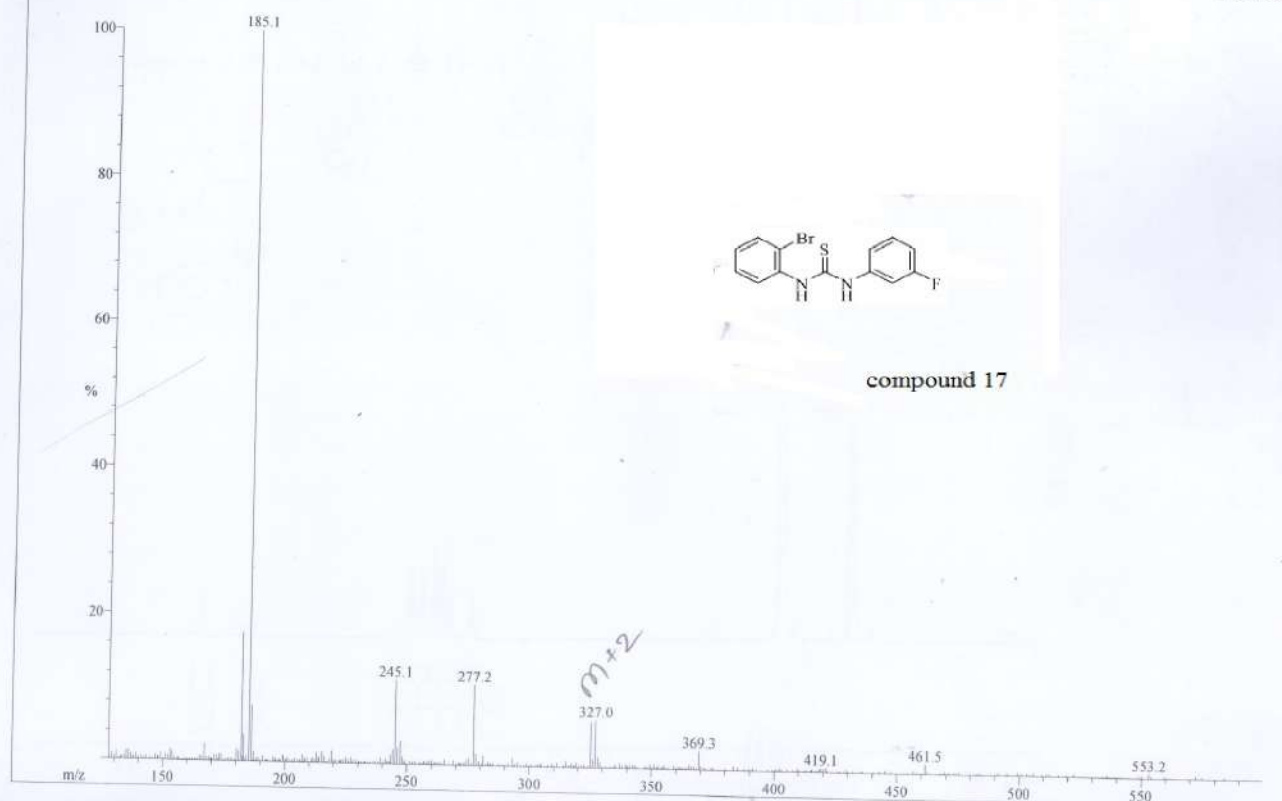

File: BB-IV-20-FABP Date Run: 08-29-2015 (Time Run: 12:27:29)  
Sample: BILQUEES / DR. KHALID FAB ANALYSIS +/-  
Instrument: JEOL JMS-600H  
Inlet: Direct Probe Ionization mode: FAB+

Run By: HEJ (ICCBS)

Scan: 11

R.T.: .88

Base: m/z 185; 31.7%FS TIC: 1543927

#Ions: 649

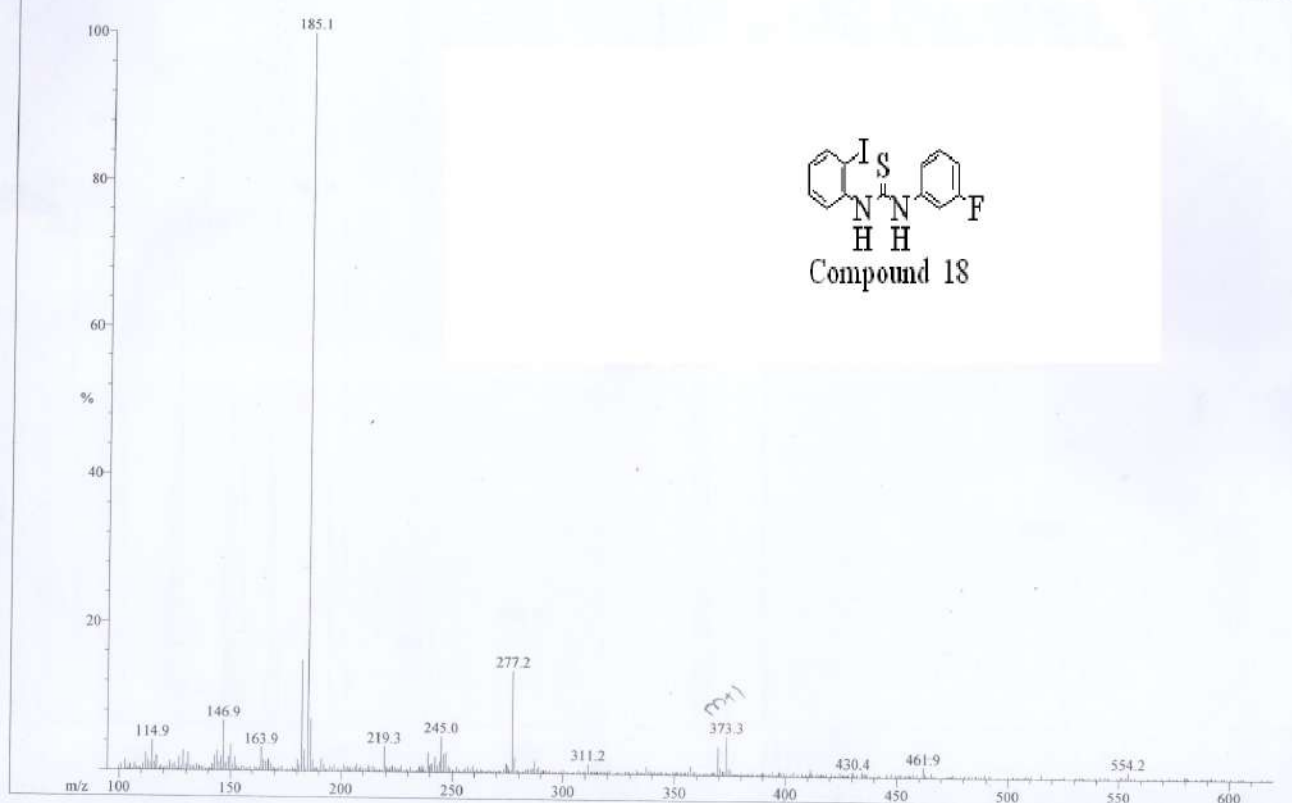

Creation Time : d:\mswin\data\bb-iv-22.ms  
File Type : 01.01.90 at 2:04:19  
File Size : Lo-Res Mass Data (Centroid)  
File Title : Acquired on MASPEC system [msw/A091]  
Operator : BILQUEES BANO / DR. KHALID  
Instrument : Barkat Ali  
MAT312---EI

SCAN GRAPH. Flagging=M/z  
Scan 4-2:47. Entries=82. 100% Int.=60809.

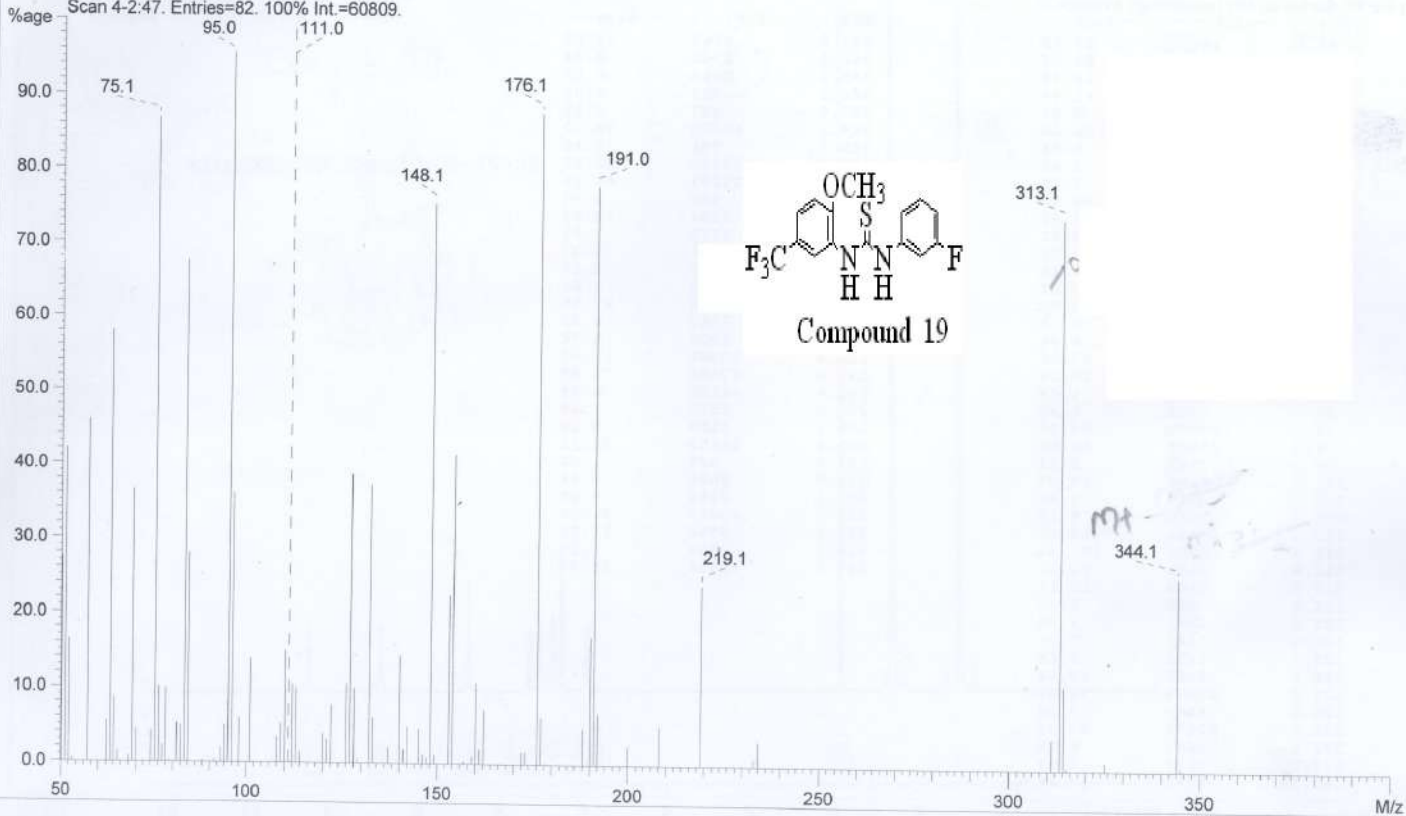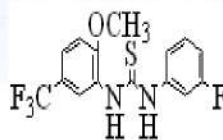

Compound 19

File: BB-IV-38-FABP Date Run: 08-29-2015 (Time Run: 12:50:26)  
Sample: BILQUEES / DR. KHALID FAB ANALYSIS +/-  
Instrument: JEOL JMS-600H  
Inlet: Direct Probe

Ionization mode: FAB+

Run By: HEJ (ICCBS)

Scan: 5  
Base: m/z 315; 40.9%FS TIC: 3937102

R.T.: .37

#Ions: 738

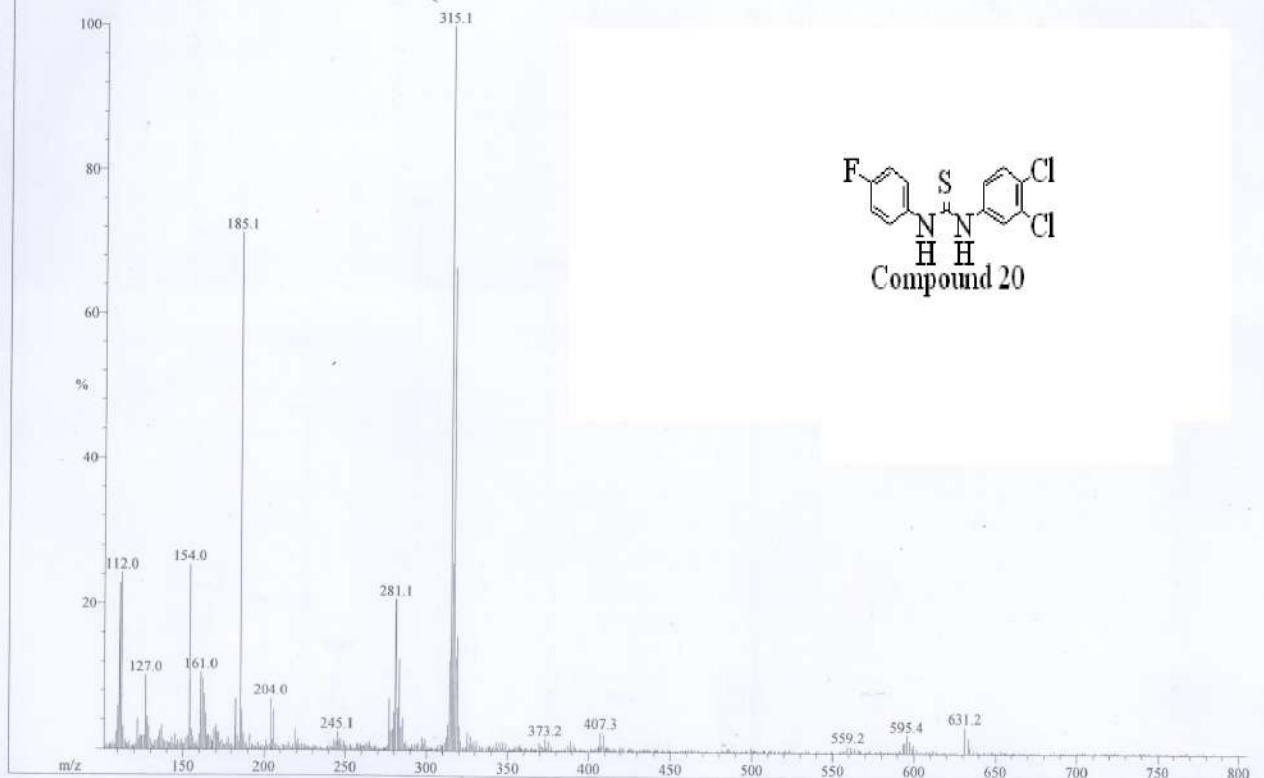

Supplement: Supplementary file 2 [file 1]
