# Supplementary material
Source: publisher figshare collection journal article supplement (https://tandf.figshare.com/articles/dataset/_/25243417)
Supplement: Supplementary file 1 [file 1]

# Compound1

BILQEES/DR.KHALID/BB.III.94  
1H/

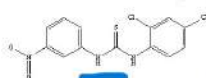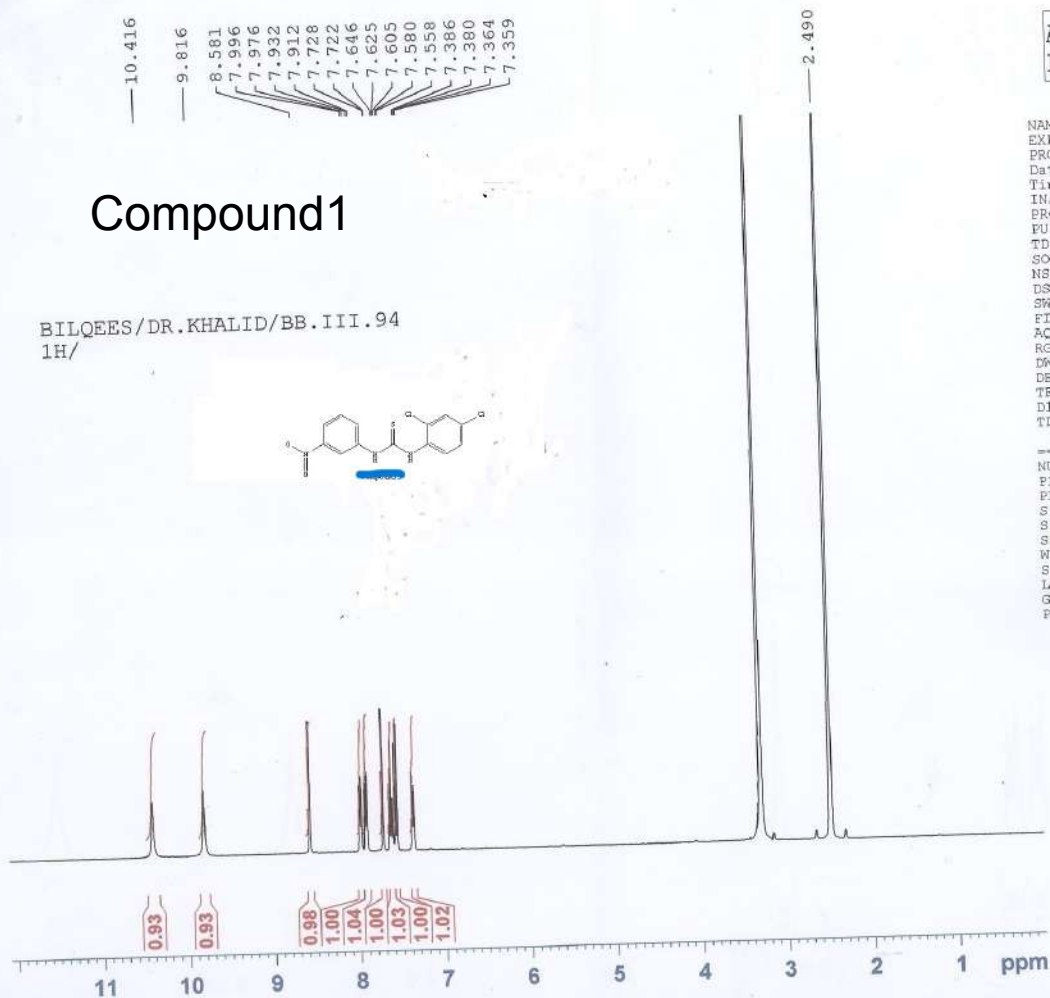

AVANCE AV-400 MHz  
Lab # 115

NAME may25-15  
EXPNO 2  
PROCNO 1  
Date 20150525  
Time 10.54  
INSTRUM spect  
PROBHD 5 mm SEI 1H-13  
PULPROG zg30  
TD 32768  
SOLVENT DMSO  
NS 64  
DS 0  
SMH 8012.820 Hz  
FIDRES 0.244532 Hz  
AQ 2.0447731 sec  
RG 456.1  
DN 62.400 usec  
DE 6.50 usec  
TE 300.0 K  
D1 2.00000000 sec  
TDO 1

CHANNEL f1  
NUC1 1H  
P1 10.80 usec  
PL1 3.00 dB  
SFO1 400.0332002 MHz  
SI 16384  
SF 400.0300041 MHz  
WDW EM  
SSB 0  
LB 0.30 Hz  
GB 0  
PC 1.00

# Compound2

BILQEES/DR.KHALID/BB.III.83  
1H/

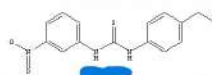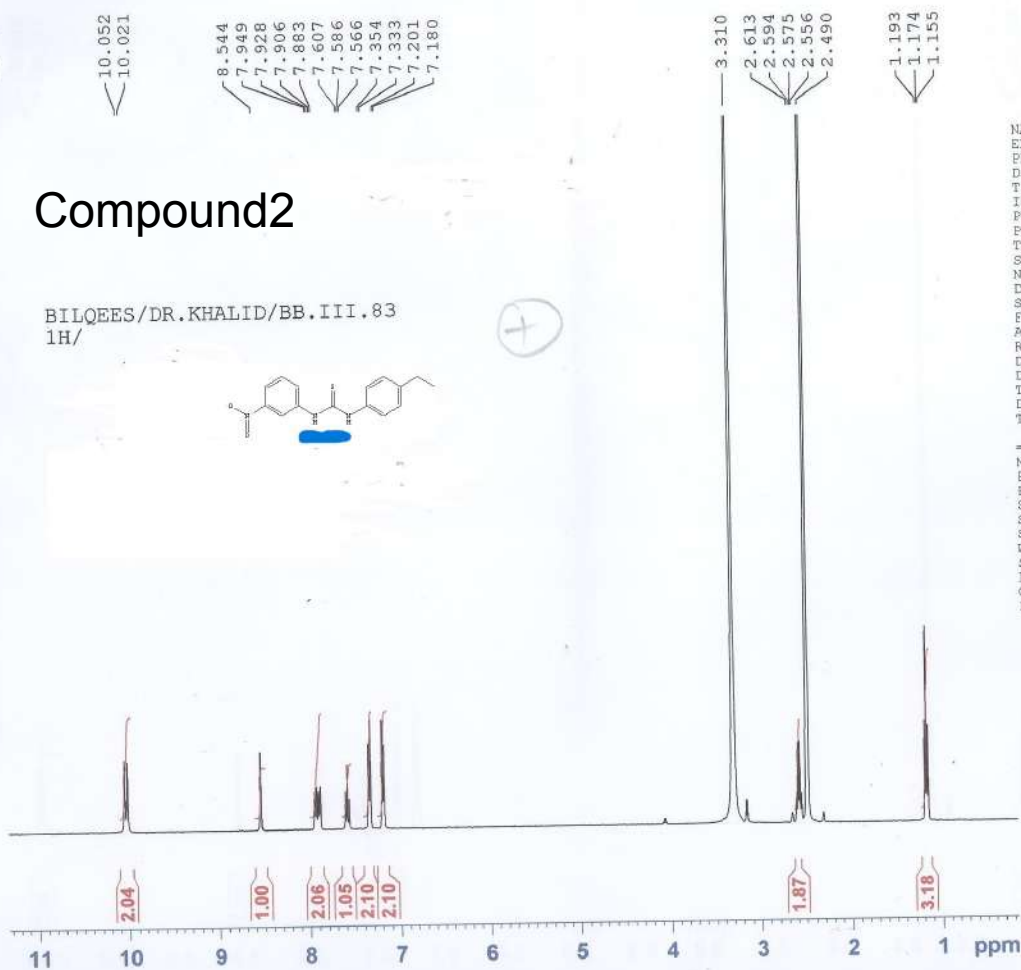

AVANCE AV-400 MHz  
Lab # 115

NAME may07-15  
EXPNO 16  
PROCNO 1  
Date 20150507  
Time 13.09  
INSTRUM spect  
PROBHD 5 mm SEI 1H-13  
PULPROG zg30  
TD 32768  
SOLVENT DMSO  
NS 64  
DS 0  
SWH 8012.820 Hz  
FIDRES 0.244532 Hz  
AQ 2.0447731 sec  
RG 256  
CW 62.400 usec  
DE 6.50 usec  
TE 300.0 K  
DI 2.00000000 sec  
TDO 1

===== CHANNEL f1 =====  
NUC1 1H  
P1 10.80 usec  
PL1 3.00 dB  
SFO1 400.0332002 MHz  
SI 16384  
SF 400.0300041 MHz  
WDW EM  
SSB 0  
LB 0.30 Hz  
GB 0  
PC 1.00

# Compound3

BILQEES/DR.KHALID/BB.III.90  
1H/

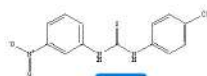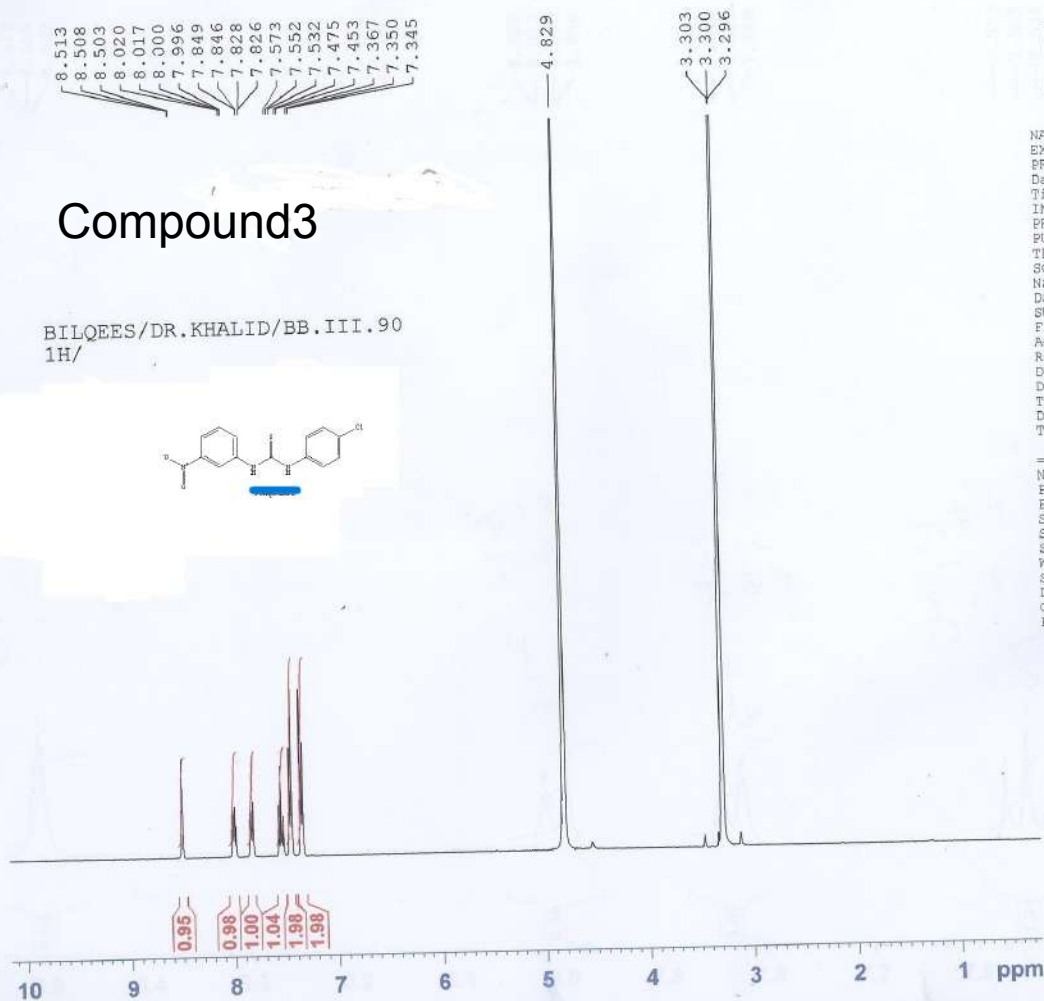

AVANCE AV-400 MHz  
Lab # 115

NAME apr10-15  
EXPNO 10  
PROCNO 1  
Date 20150410  
Time 12.55  
INSTRUM spect  
PROBHD 5 mm SEI 1H-13  
PULPROG zg30  
TD 32768  
SOLVENT MeOD  
NS 64  
DS 0  
SWH 8012.820 Hz  
FIDRES 0.244532 Hz  
AQ 2.0447731 sec  
RG 456.1  
RW 62.400 usec  
DE 6.50 usec  
TE 300.0 K  
D1 2.00000000 sec  
TDO 1

===== CHANNEL f1 =====  
NUC1 1H  
P1 10.80 usec  
PL1 3.00 dB  
SFO1 400.0332002 MHz  
SI 16384  
SF 400.0300087 MHz  
WDW EM  
SSB 0  
LB 0.30 Hz  
GB 0  
PC 1.00

# Compound4

BILQEES/DR.KHALID/BB.III.95  
1H/

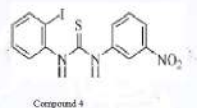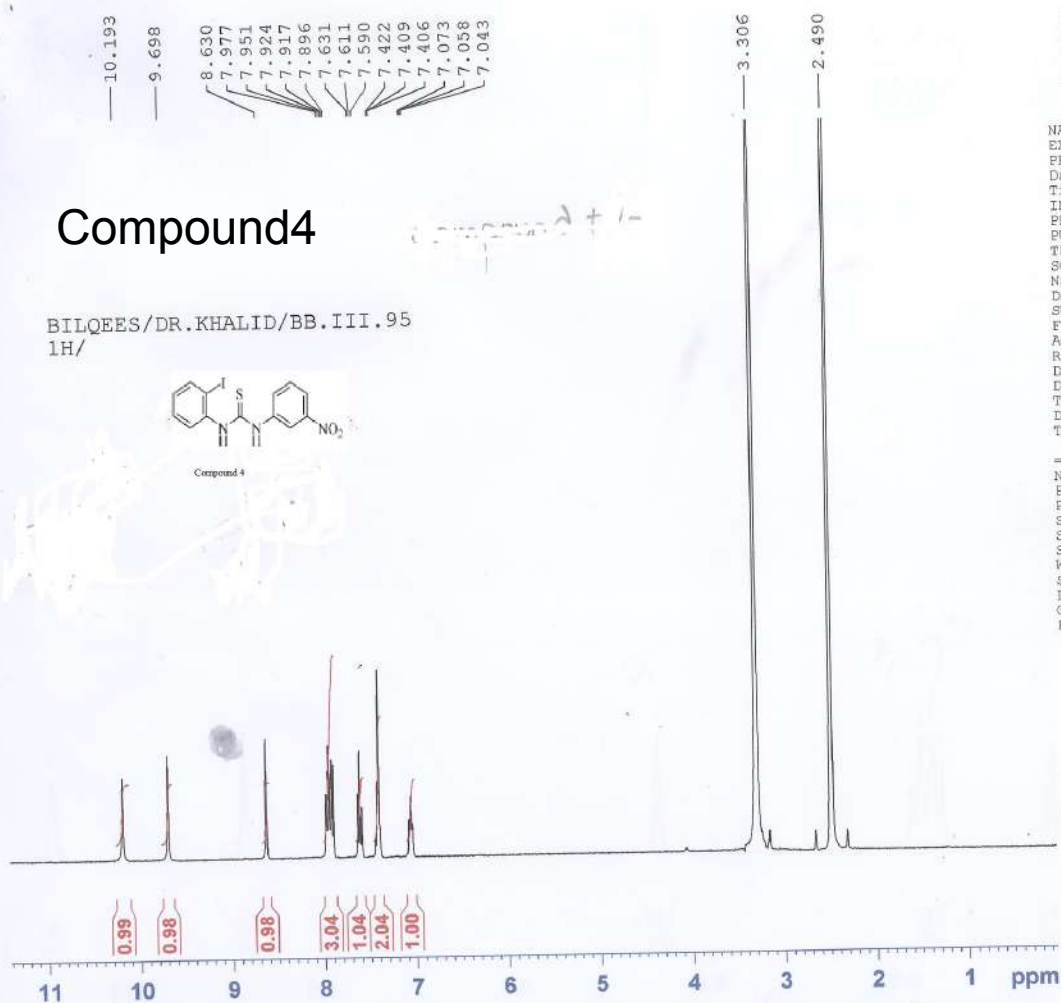

AVANCE AV-400 MHz  
Lab # 115

NAME may25-15  
EXPNO 1  
PROCNO 1  
Date 20150525  
Time 11.01  
INSTRUM spect  
PROBHD 5 mm SEI 1H-13  
PULPROG zg30  
TD 32768  
SOLVENT DMSO  
NS 64  
DS 0  
SWH 8012.820 Hz  
FIDRES 0.244532 Hz  
AQ 2.0447731 sec  
RG 456.1  
DN 62.400 usec  
DE 6.50 usec  
TE 300.0 K  
D1 2.00000000 sec  
TDO 1

===== CHANNEL f1 =====  
NUC1 1H  
P1 10.80 usec  
PL1 3.00 dB  
SFO1 400.0332002 MHz  
SI 16384  
SF 400.0300041 MHz  
WDW EM  
SSB 0  
LB 0.30 Hz  
GB 0  
PC 1.00

# Compound5

BILQEES/DR.KHALID/BB.III.96  
1H/

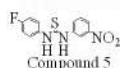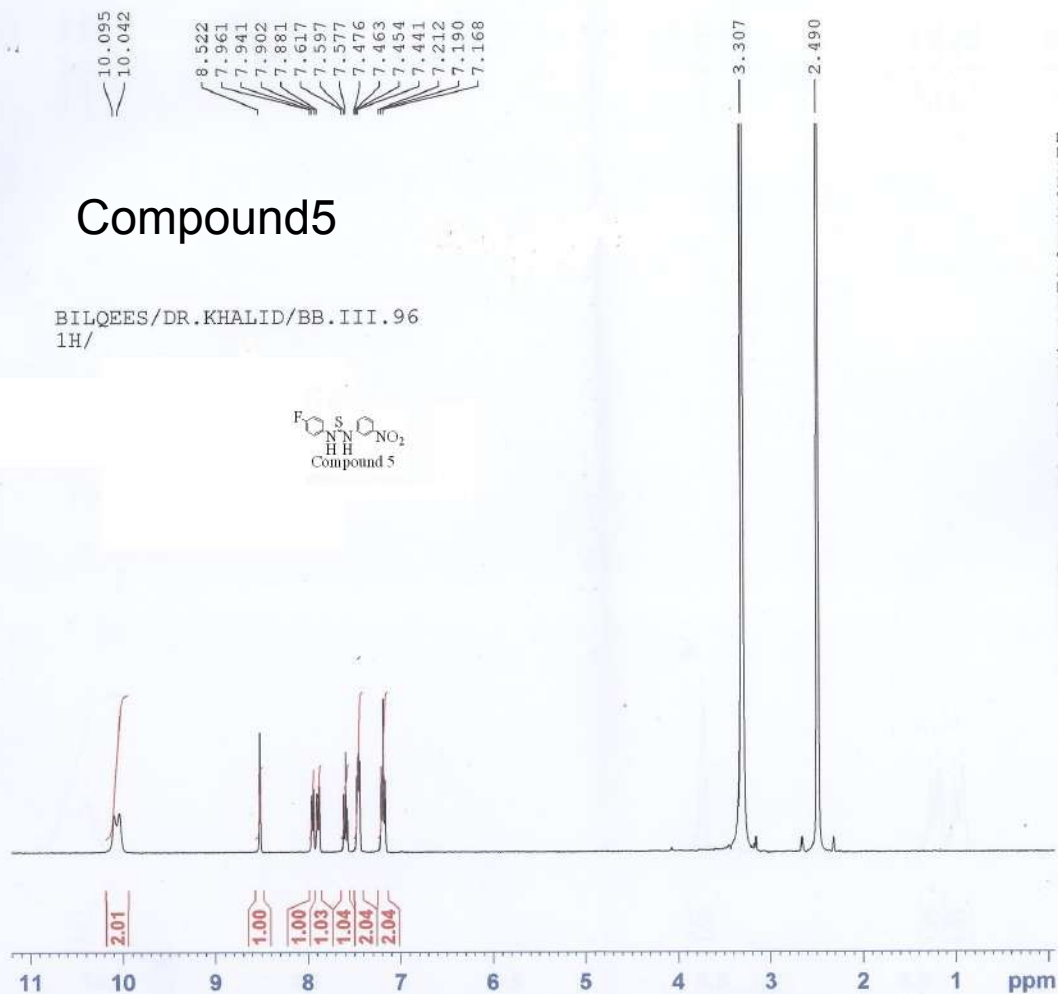

AVANCE AV-400 MHz  
Lab # 115

NAME may25-15  
EXPNO 4  
PROCNO 1  
Date\_ 20150525  
Time\_ 11.08  
INSTRUM spect  
PROBHD 5 mm SEI 1H-13  
PULPROG zg30  
TD 32768  
SOLVENT DMSO  
NS 64  
DS 0  
SWH 8012.820 Hz  
FIDRES 0.244532 Hz  
AQ 2.0447731 sec  
RG 322.5  
DM 62.400 usec  
DE 6.50 usec  
TE 300.0 K  
D1 2.00000000 sec  
TD0 1

===== CHANNEL f1 =====  
NUC1 1H  
P1 10.80 usec  
PL1 3.00 dB  
SFO1 400.0332002 MHz  
SI 16384  
SF 400.0300041 MHz  
WDW EM  
SSB 0  
LB 0.30 Hz  
GB 0  
PC 1.00

# Compound 6

BILQEES/DR.KHALID/BB.IV.III  
1H/

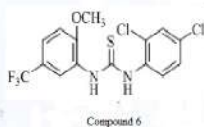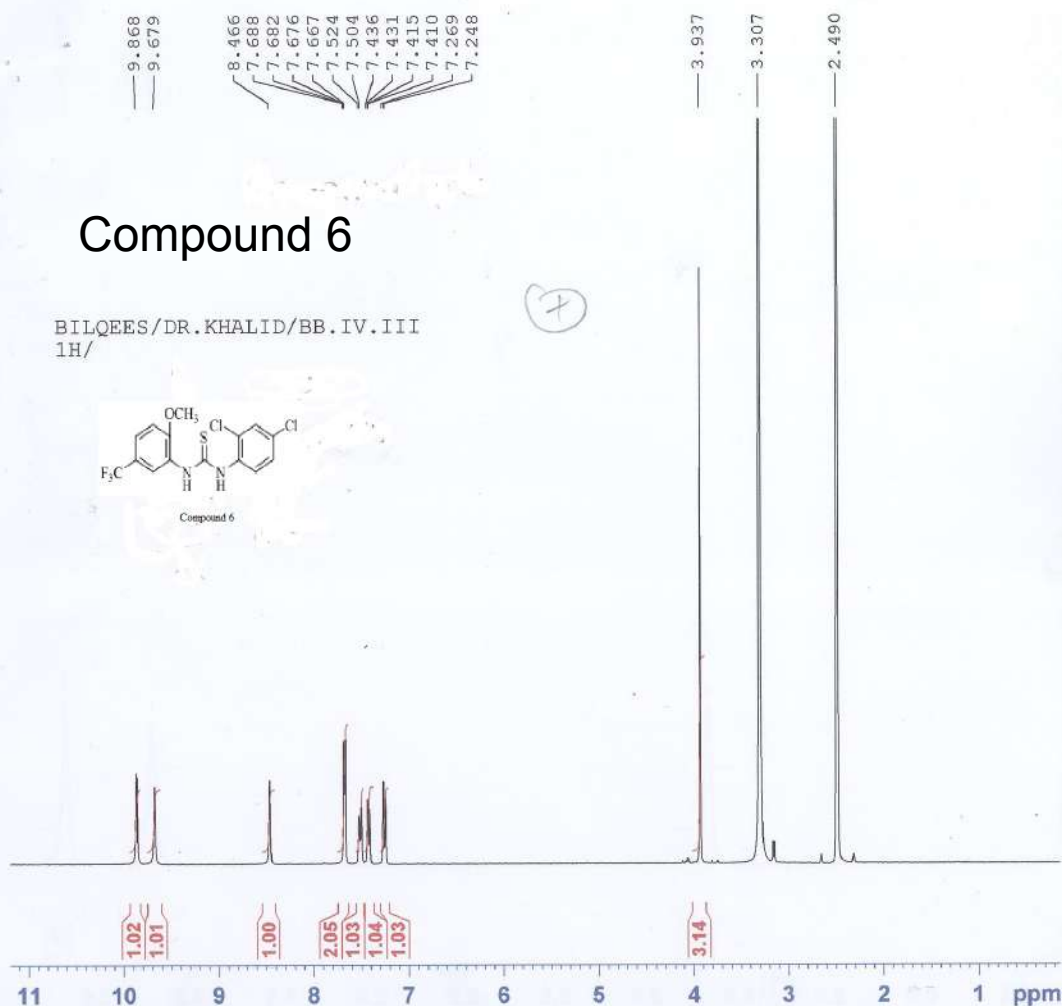

AVANCE AV-400 MHz  
Lab # 115

NAME may21-15  
EXPNO 17  
PROCNO 1  
Date 20150521  
Time 16.00  
INSTRUM spect  
PROBHD 5 mm SEI 1H-13  
PULPROG zg30  
TD 32768  
SOLVENT DMSO  
NS 64  
DS 0  
SWH 8012.820 Hz  
FIDRES 0.244532 Hz  
AQ 2.0447731 sec  
RG 256  
DW 62.400 usec  
DE 6.50 usec  
TE 300.0 K  
D1 2.00000000 sec  
TD0 1

===== CHANNEL f1 =====  
NUC1 1H  
P1 10.80 usec  
PL1 3.00 dB  
SFO1 400.0332002 MHz  
SI 16384  
SF 400.0300041 MHz  
WDW EM  
SSB 0  
LB 0.30 Hz  
GB 0  
PC 1.00

# Compound 7

BILQEES/DR.KHALID/BB.IV.4  
1H/

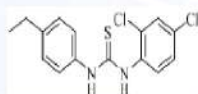

COMPOUND 7

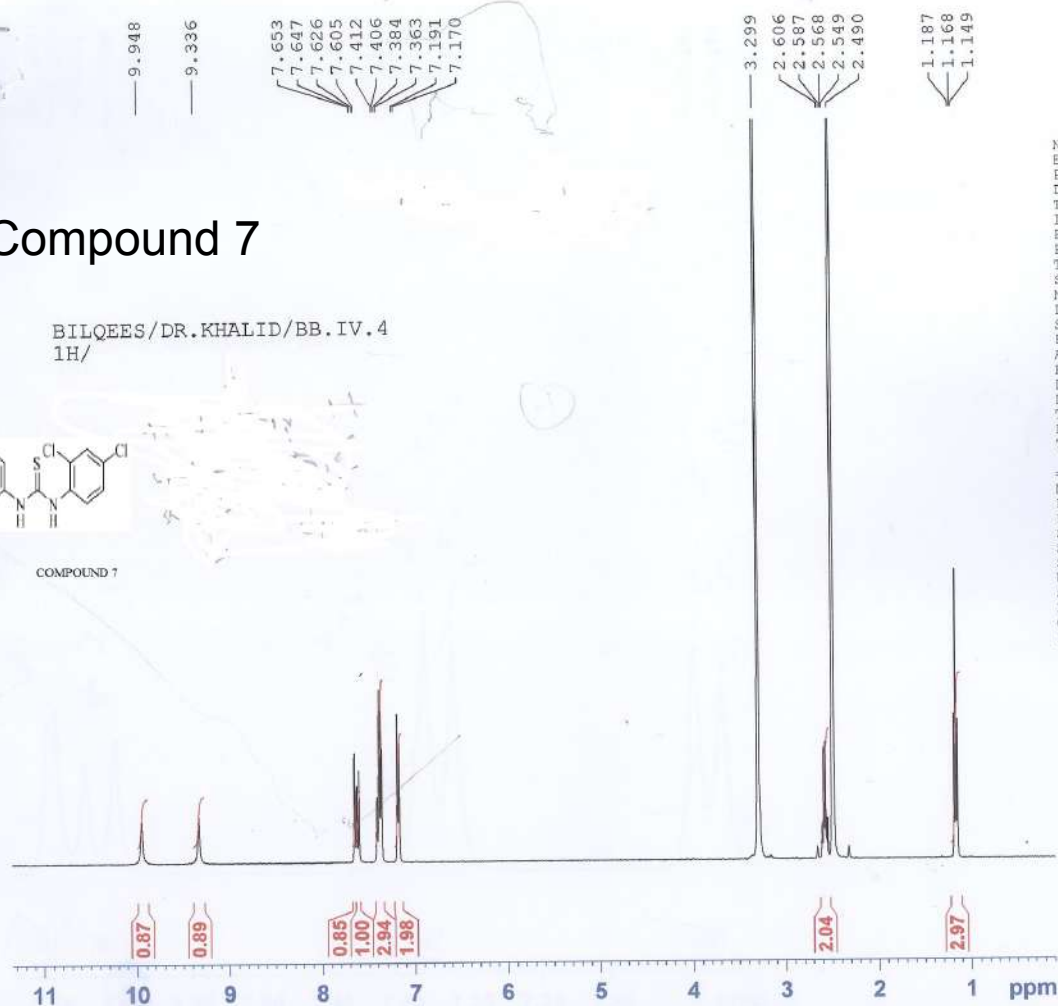

AVANCE AV-400 MHz  
Lab # 115

NAME may25-15  
EXPNO 1  
PROCNO 1  
Date 20150525  
Time 10.46  
INSTRUM spect  
PROBHD 5 mm SEI 1H-13  
PULPROG zg30  
TD 32768  
SOLVENT DMSO  
NS 64  
DS 0  
SWH 8012.820 Hz  
FIDRES 0.244532 Hz  
AQ 2.0447731 sec  
RG 456.1  
DW 62.400 usec  
DE 6.50 usec  
TE 300.0 K  
D1 2.00000000 sec  
TDO 1

===== CHANNEL f1 =====  
NUC1 1H  
P1 10.80 usec  
PL1 3.00 dB  
SFO1 400.0332002 MHz  
SI 16384  
SF 400.0300041 MHz  
WDW EM  
SSB 0  
LB 0.30 Hz  
GB 0  
PC 1.00



# Compound 8

BILQEES/DR. KHALID/BB.IV.6.  
1H/

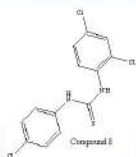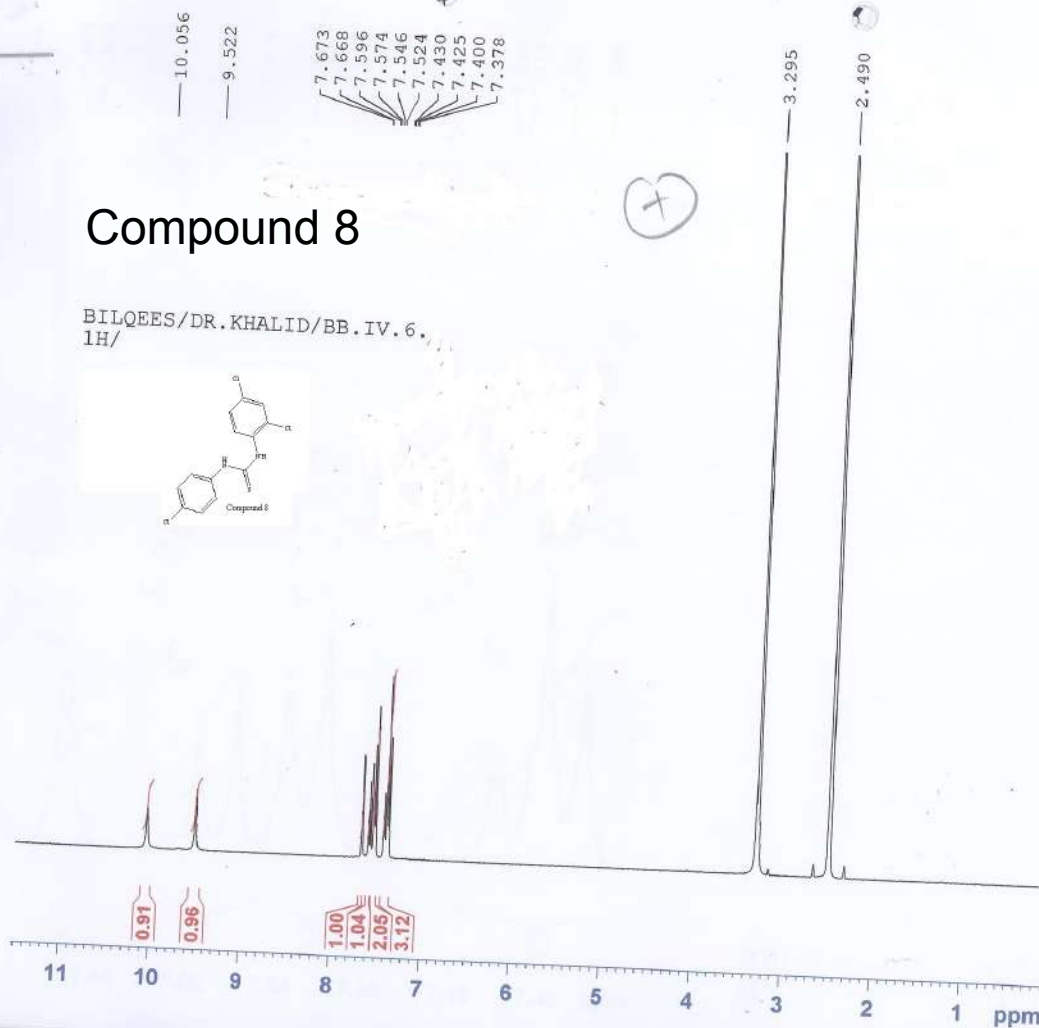

AVANCE AV-400 MHz  
Lab # 115

NAME may26-15  
EXPNO 12  
PROCNO 1  
Date 20150526  
Time 14.17  
INSTRUM spect  
PROBHD 5 mm SEI 1H-13  
PULPROG zg30  
TD 32768  
SOLVENT DMSO  
NS 64  
DS 0  
SWH 8012.820 Hz  
FIDRES 0.244532 Hz  
AQ 2.0447731 sec  
RG 574.7  
DW 62.400 usec  
DE 6.50 usec  
TE 300.0 K  
D1 2.00000000 sec  
TD0 1

===== CHANNEL f1 =====  
NUC1 1H  
P1 10.80 usec  
PL1 3.00 dB  
SFO1 400.0332002 MHz  
SI 16384  
SF 400.0300041 MHz  
WDW EM  
SSB 0  
LB 0.30 Hz  
GB 0  
PC 1.00



# Compound 9

BILQEES/DR.KHALID/BB.IV.8  
1H/

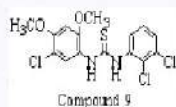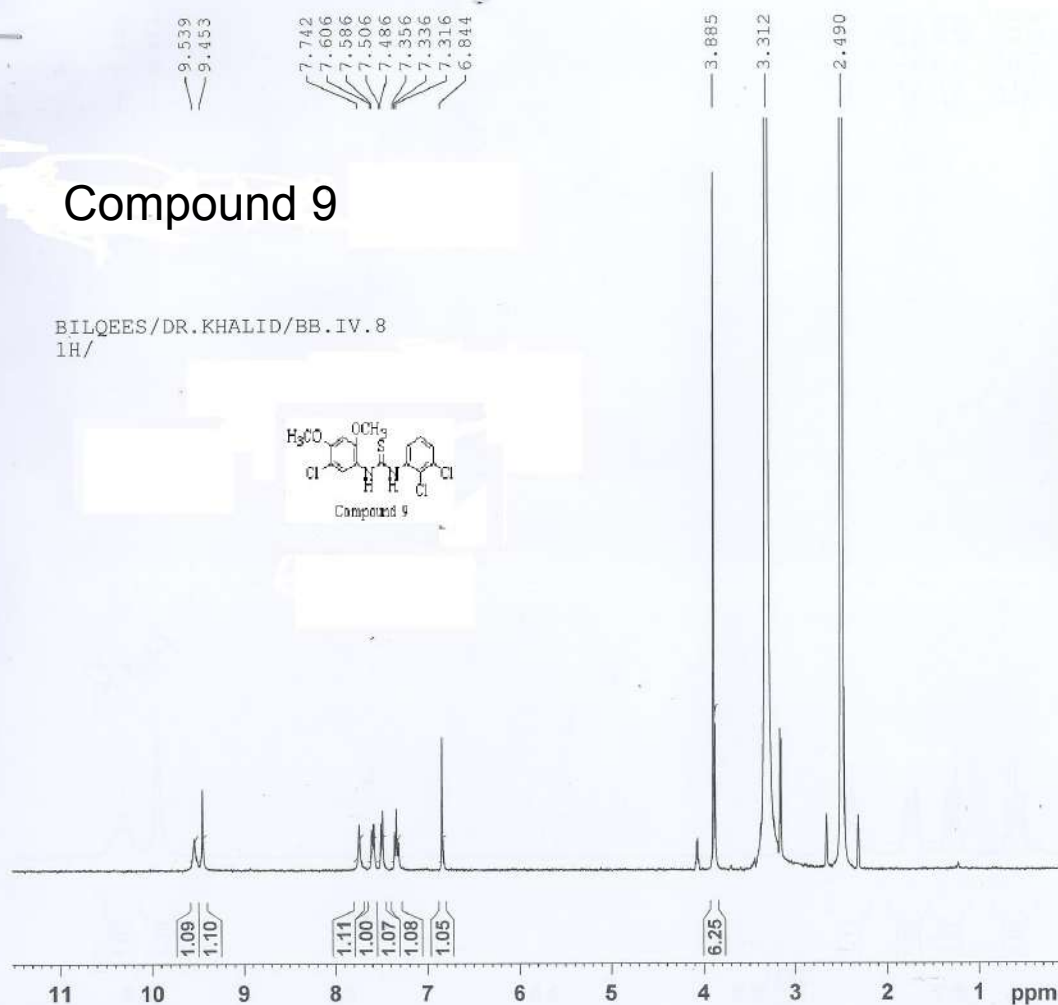

AVANCE AV-400 MHz  
Lab # 115

NAME jun15-15  
EXPNO 4  
PROCNO 1  
Date 20150615  
Time 12.02  
INSTRUM spect  
PROBHD 5 mm SEI 1H-13  
PULPROG zg30  
TD 32768  
SOLVENT DMSO  
NS 64  
DS 0  
SWH 8012.820 Hz  
FIDRES 0.244532 Hz  
AQ 2.0447731 sec  
RG 256  
DW 62.400 usec  
DE 6.50 usec  
TE 300.0 K  
DL 2.00000000 sec  
TD0 1

===== CHANNEL f1 =====  
NUC1 1H  
P1 10.80 usec  
PL1 3.00 dB  
SFO1 400.0332002 MHz  
SI 16384  
SF 400.0300041 MHz  
WDW EM  
SSB 0  
LB 0.30 Hz  
GB 0  
PC 1.00

BILQUES/DR,KHALID/BB-IV-11/  
ICCBS,U,O,K/

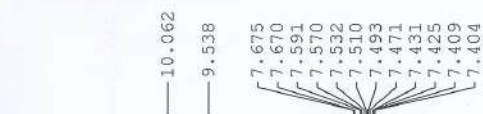

Compound 10

AVANCE 400  
LAB NO 117

NAME june01-15  
EXPNO 6  
PROCNO 1  
Date 20150601  
Time 11.34  
INSTRUM spect  
PROBHD 5 mm DUL 13C-1  
PULPROG zg30  
TD 32768  
SOLVENT DMSO  
NS 64  
DS 0  
SWH 8012.820 Hz  
FIDRES 0.244532 Hz  
AQ 2.0447731 sec  
RG 322.5  
DW 62.400 usec  
DE 6.50 usec  
TE 300.0 K  
D1 2.00000000 sec  
TD0 1

===== CHANNEL f1 =====  
NUC1 1H  
P1 10.20 usec  
PL1 0.00 dB  
SFO1 400.1332010 MHz  
SI 16384  
SF 400.1300064 MHz  
WDW EM  
SSB 0  
LB 0.30 Hz  
GB 0  
PC 1.00

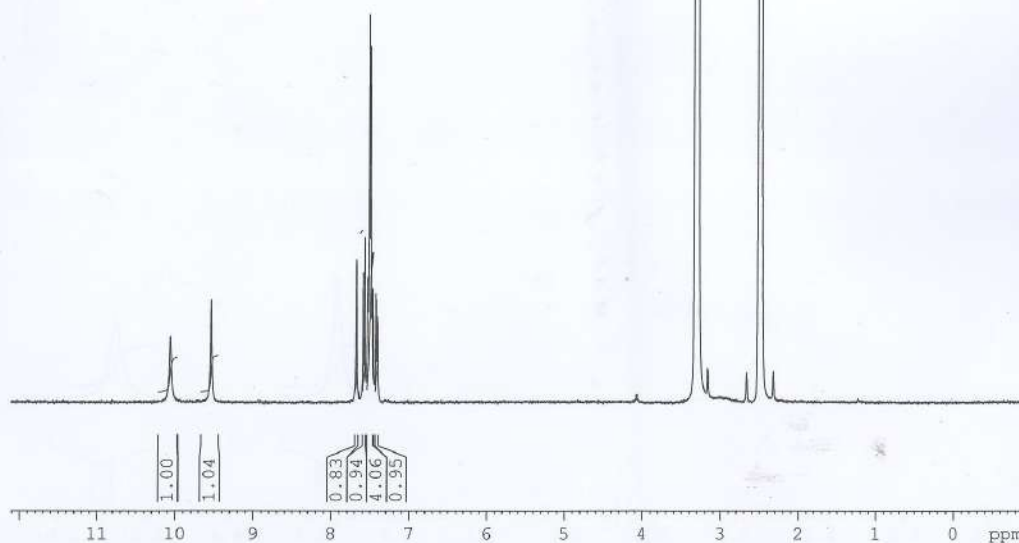

# Compound 11

Bilquees / Dr.Khalid / BB-IV-13  
1H

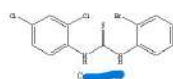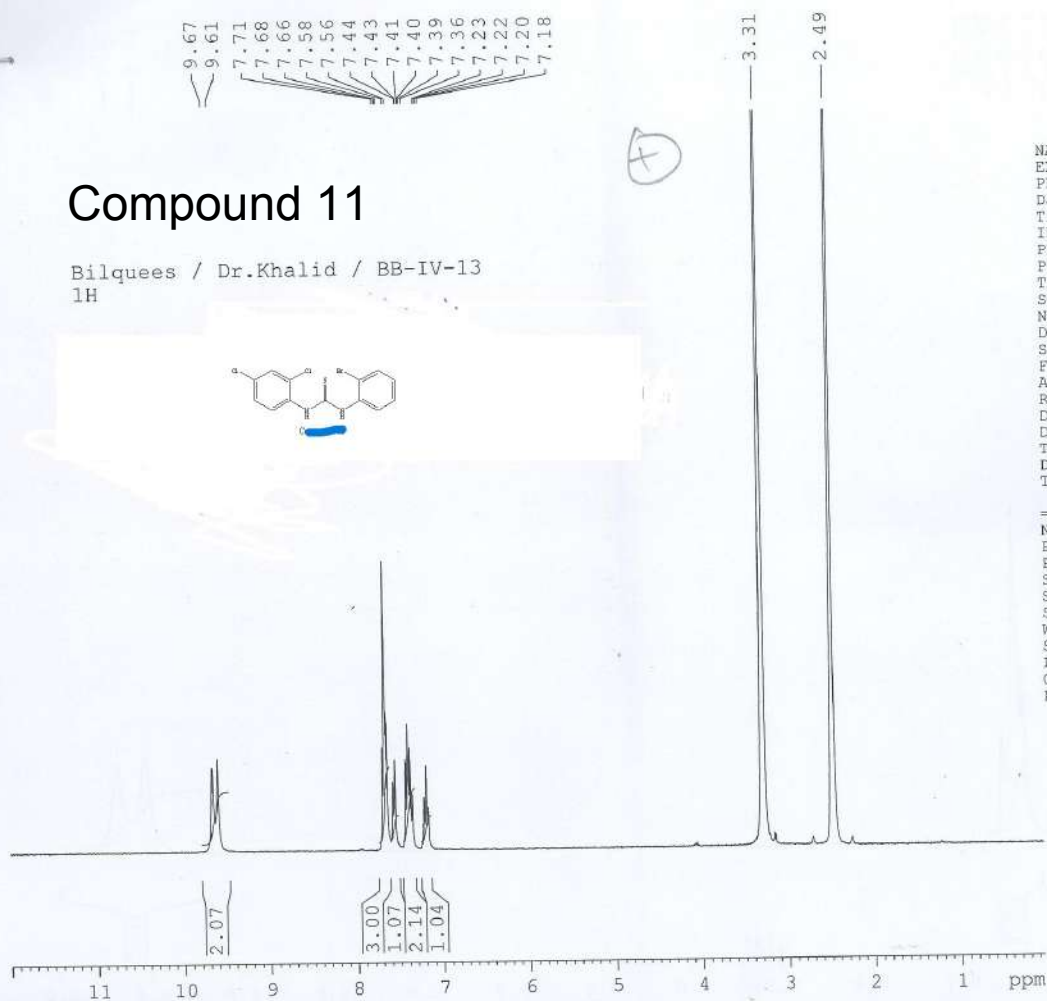

AVANCE AV-300  
LAB NO: 108

NAME june08-15  
EXPNO 2  
PROCNO 1  
Date\_ 20150608  
Time\_ 10.41  
INSTRUM spect  
PROBHD 5 mm DUL 13C-1  
PULPROG zg30  
TD 32768  
SOLVENT DMSO  
NS 32  
DS 0  
SWH 5995.204 Hz  
FIDRES 0.182959 Hz  
AQ 2.7329011 sec  
RG 574.7  
DW 83.400 usec  
DE 6.50 usec  
TE 299.2 K  
D1 2.00000000 sec  
TDO 1

===== CHANNEL f1 =====  
NUC1 1H  
P1 12.30 usec  
PL1 4.00 dB  
SFO1 300.1321009 MHz  
SI 32768  
SF 300.1300041 MHz  
WDW EM  
SSB 0  
LB 0.30 Hz  
GB 0  
PC 0.60

# Compound 12

BILQEES/DR.KHALID/BB.IV.10  
1H/

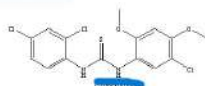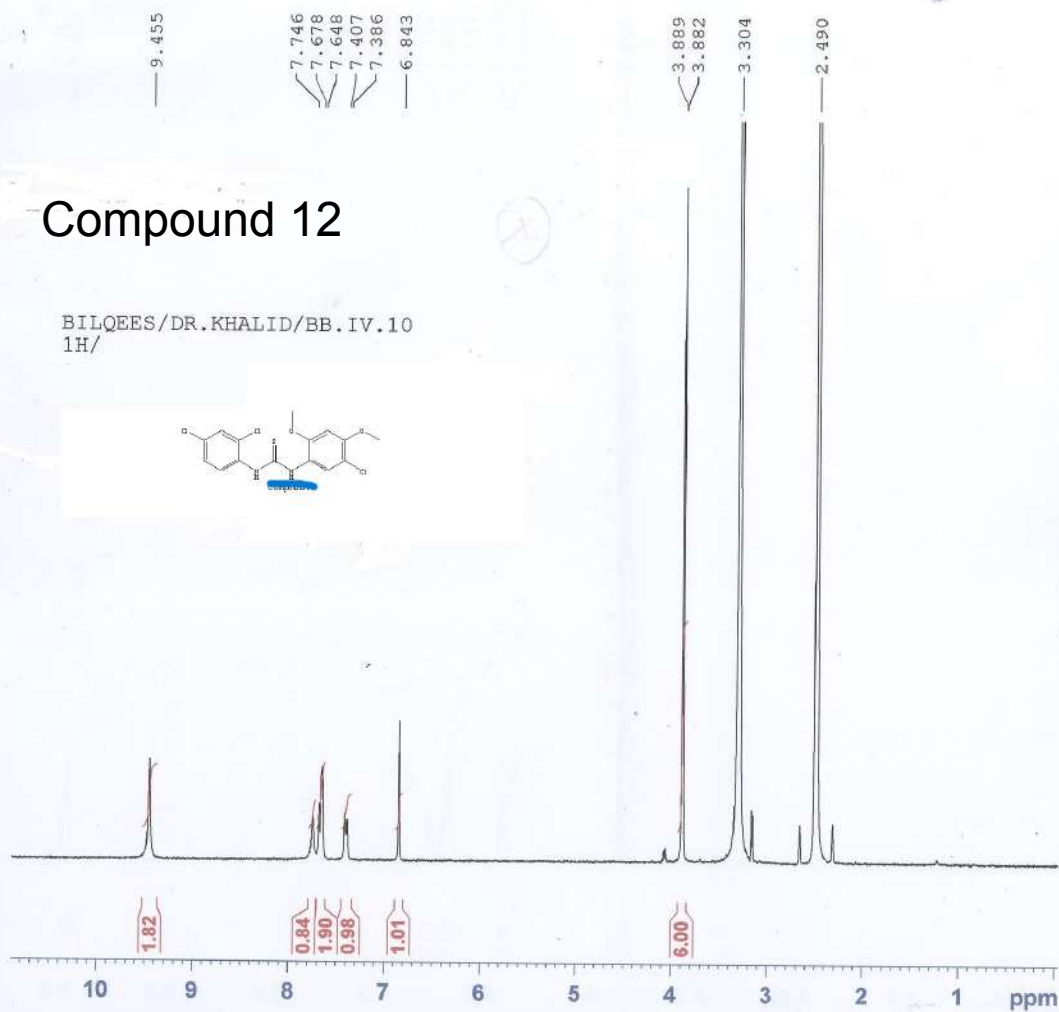

AVANCE AV-400 MHz  
Lab # 115

NAME jun04-15  
EXPNO 3  
PROCNO 1  
Date 20150604  
Time 12.03  
INSTRUM spect  
PROBHD 5 mm SEI 1H-13  
PULPROG zg30  
TD 32768  
SOLVENT DMSO  
NS 64  
DS 0  
SWH 8012.820 Hz  
FIDRES 0.244532 Hz  
AQ 2.0447731 sec  
RG 512  
DN 62.400 usec  
DE 6.50 usec  
TE 300.0 K  
D1 2.00000000 sec  
TD0 1

===== CHANNEL f1 =====  
NUC1 1H  
P1 10.80 usec  
PL1 3.00 dB  
SF01 400.0332002 MHz  
SI 16384  
SF 400.0300041 MHz  
WDW EM  
SSB 0  
LB 0.30 Hz  
GB 0  
PC 1.00

# Compound 13

Bilquees / Dr.Khalid / BB-IV-9  
1H

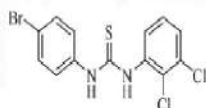

COMPOUND

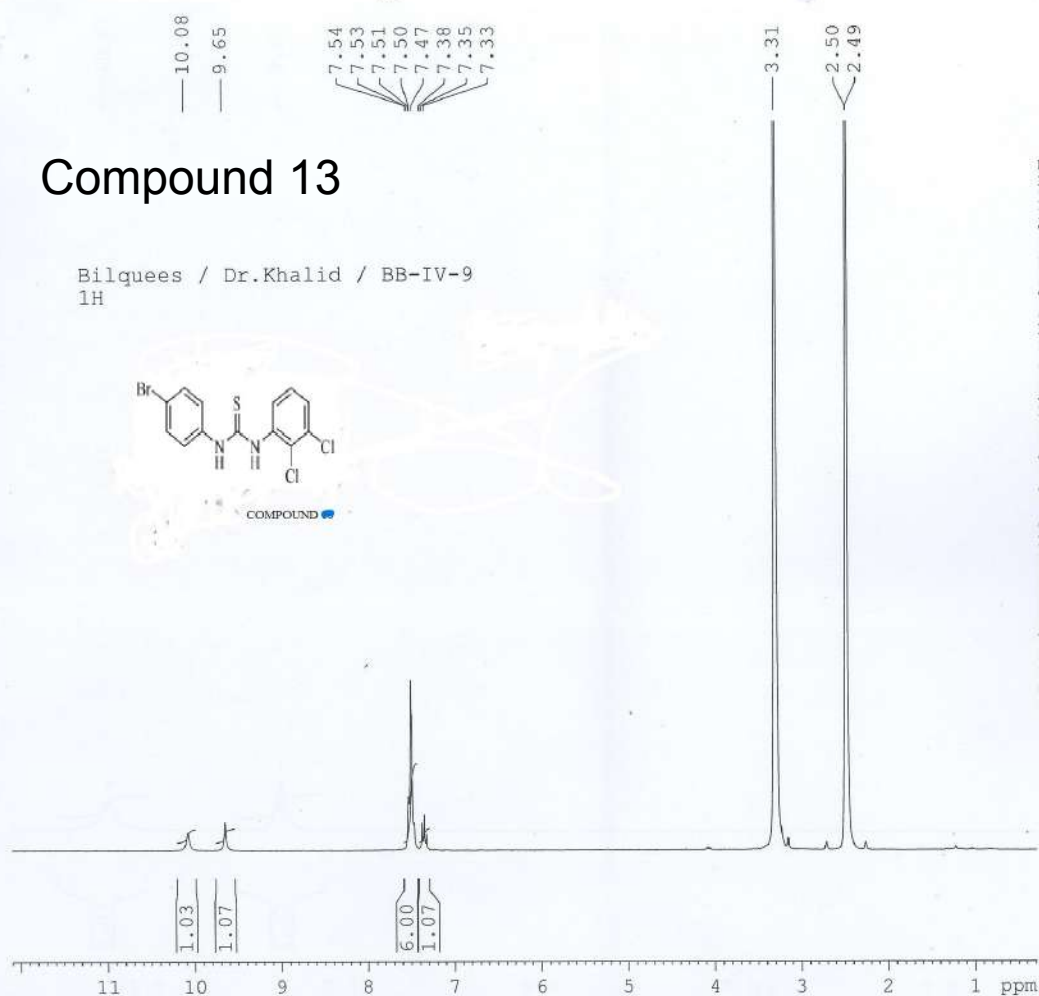

AVANCE AV-300  
LAB NO: 108

NAME june09-15  
EXPNO 8  
PROCNO 1  
Date 20150609  
Time 12.20  
INSTRUM spect  
PROBHD 5 mm DUL 13C-1  
PULPROG zg30  
TD 32768  
SOLVENT DMSO  
NS 128  
DS 0  
SWH 5995.204 Hz  
FIDRES 0.182959 Hz  
AQ 2.7329011 sec  
RG 574.7  
DW 83.400 usec  
DE 6.50 usec  
TE 298.0 K  
D1 2.00000000 sec  
TD0 1

===== CHANNEL f1 =====  
NUC1 1H  
P1 12.30 usec  
PL1 4.00 dB  
SFO1 300.1321009 MHz  
SI 32768  
SF 300.1300041 MHz  
WDW EM  
SSB 0  
LB 0.30 Hz  
GB 0  
PC 0.60

# Compound 14

Bilquees / Dr.Khalid / BB-IV-14  
1H

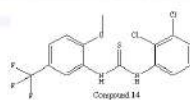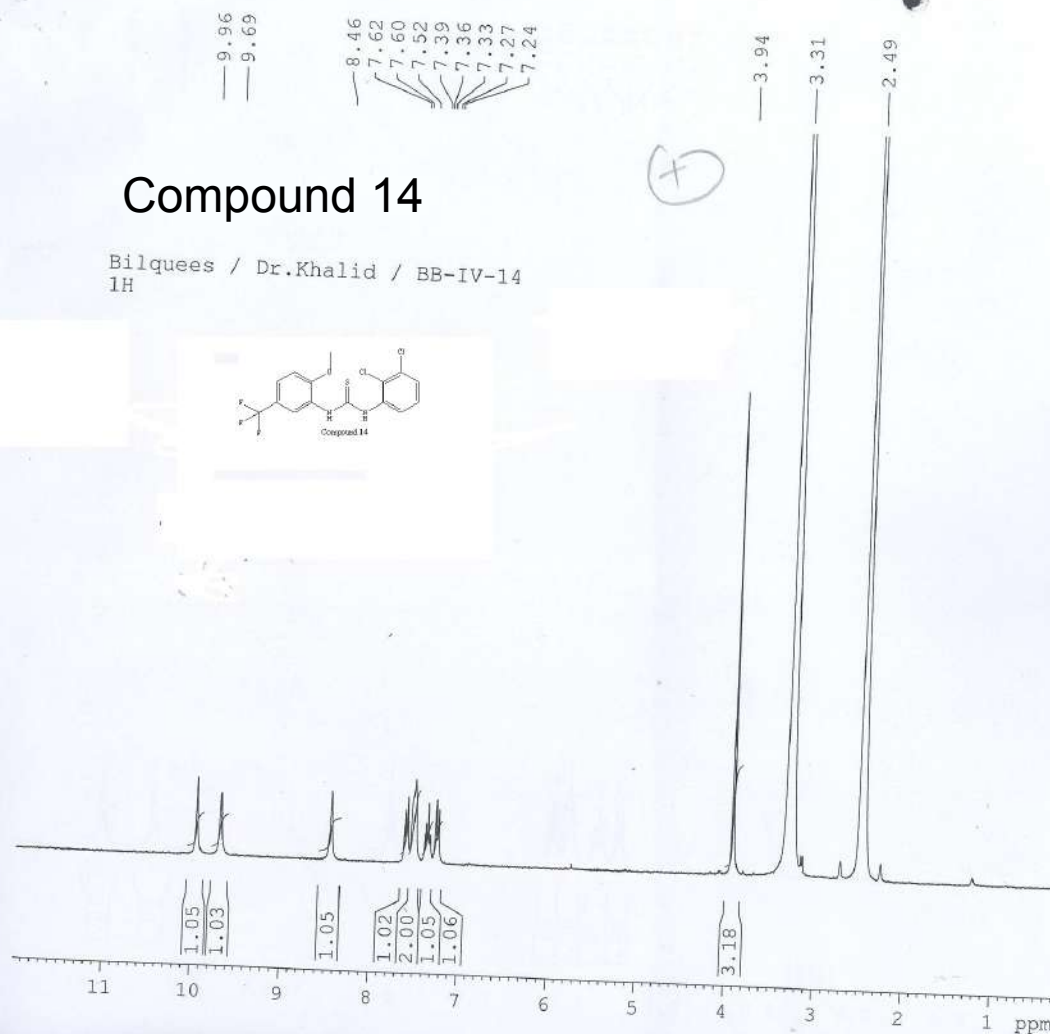

AVANCE AV-300  
LAB NO: 108

NAME june08-15  
EXPNO 4  
PROCNO 1  
Date\_ 20150608  
Time\_ 12.44  
INSTRUM spect  
PROBHD 5 mm DUL 13C-1  
PULPROG zg30  
TD 32768  
SOLVENT DMSO  
NS 128  
DS 0  
SWH 5995.204 Hz  
FIDRES 0.182959 Hz  
AQ 2.7329011 sec  
RG 574.7  
DW 83.400 usec  
DE 6.50 usec  
TE 298.4 K  
D1 1.50000000 sec  
TDO 1

===== CHANNEL f1 =====  
NUC1 1H  
P1 12.30 usec  
PL1 4.00 dB  
SFO1 300.1321009 MHz  
SI 32768  
SF 300.1300041 MHz  
WDW EM  
SSB 0  
LB 0.30 Hz  
GB 0  
PC 0.60

# Compound 15

Bilquees / Dr.Khalid / BB-IV-16  
1H

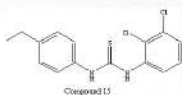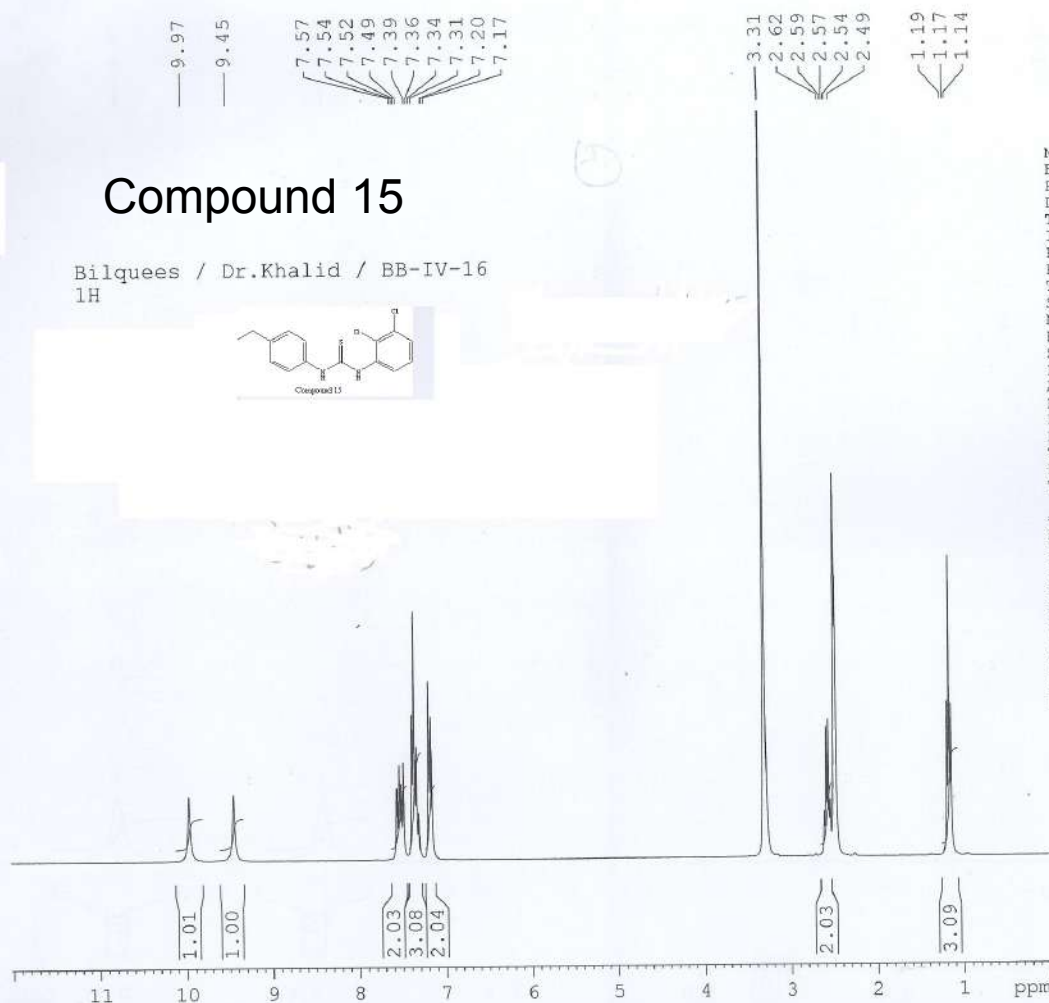

AVANCE AV-300  
LAB NO: 108

NAME june08-15  
EXPNO 3  
PROCNO 1  
Date 20150608  
Time 10.49  
INSTRUM spect  
PROBHD 5 mm DUL 13C-1  
PULPROG zg30  
TD 32768  
SOLVENT DMSO  
NS 32  
DS 0  
SWH 5995.204 Hz  
FIDRES 0.182959 Hz  
AQ 2.7329011 sec  
RG 362  
DW 83.400 usec  
DE 6.50 usec  
TE 299.1 K  
D1 1.50000000 sec  
TD0 1

===== CHANNEL f1 =====  
NUC1 1H  
P1 12.30 usec  
PL1 4.00 dB  
SFO1 300.1321009 MHz  
SI 32768  
SF 300.1300041 MHz  
WDW EM  
SSB 0  
LB 0.30 Hz  
GB 0  
PC 0.60



# Compound 16

Bilquees / Dr.Khalid / BB-IV-17  
1H

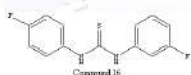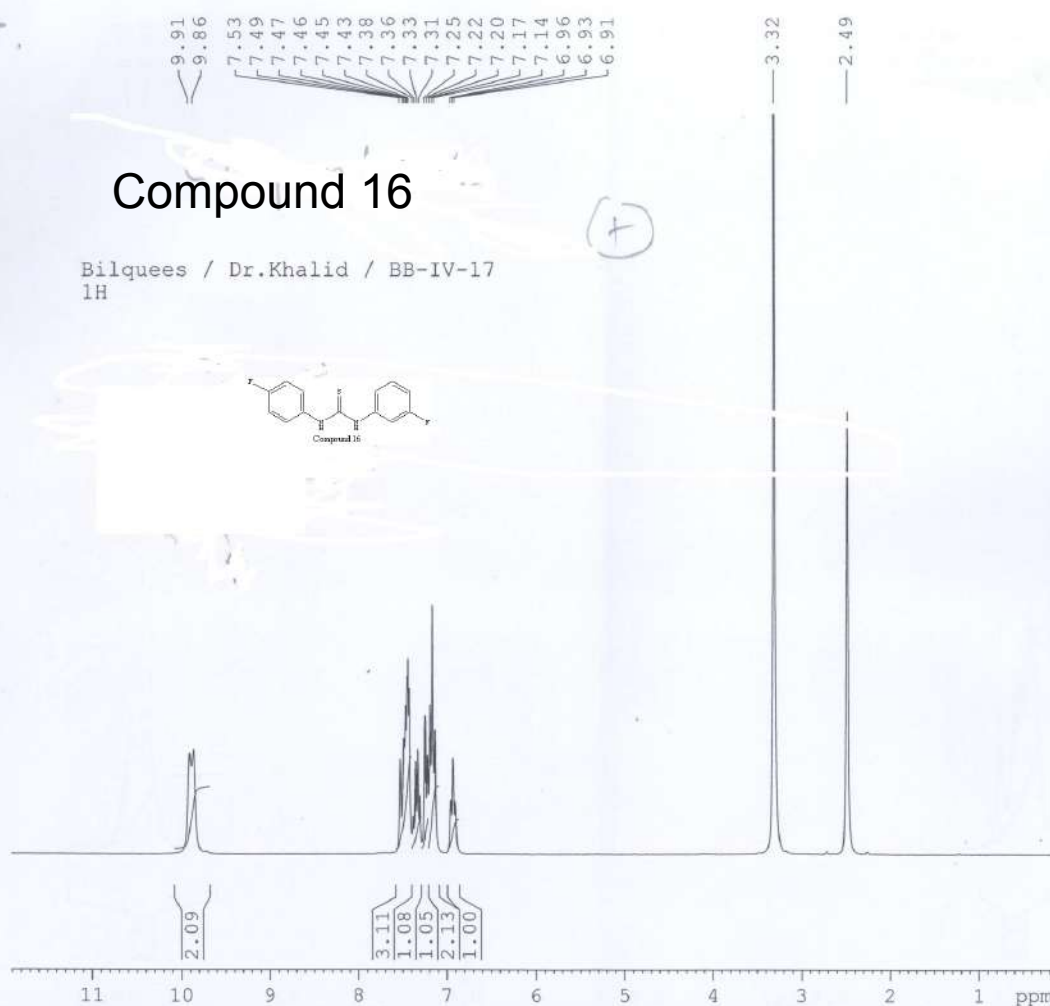

AVANCE AV-300  
LAB NO: 108

NAME june08-15  
EXPNO 1  
PROCNO 1  
Date\_ 20150608  
Time\_ 10.30  
INSTRUM spect  
PROBHD 5 mm DUL 13C-1  
PULPROG zg30  
TD 32768  
SOLVENT DMSO  
NS 32  
DS 0  
SWH 5995.204 Hz  
FIDRES 0.182959 Hz  
AQ 2.7329011 sec  
RG 362  
DW 83.400 usec  
DE 6.50 usec  
TE 299.3 K  
D1 2.00000000 sec  
TD0 1

===== CHANNEL f1 =====  
NUC1 1H  
P1 12.30 usec  
PL1 4.00 dB  
SFO1 300.1321009 MHz  
SI 32768  
SF 300.1300041 MHz  
WDW EM  
SSB 0  
LB 0.30 Hz  
GB 0  
PC 0.60

# Compound 17

Bilquees / Dr.Khalid / BB-IV-19  
1H

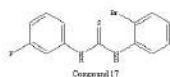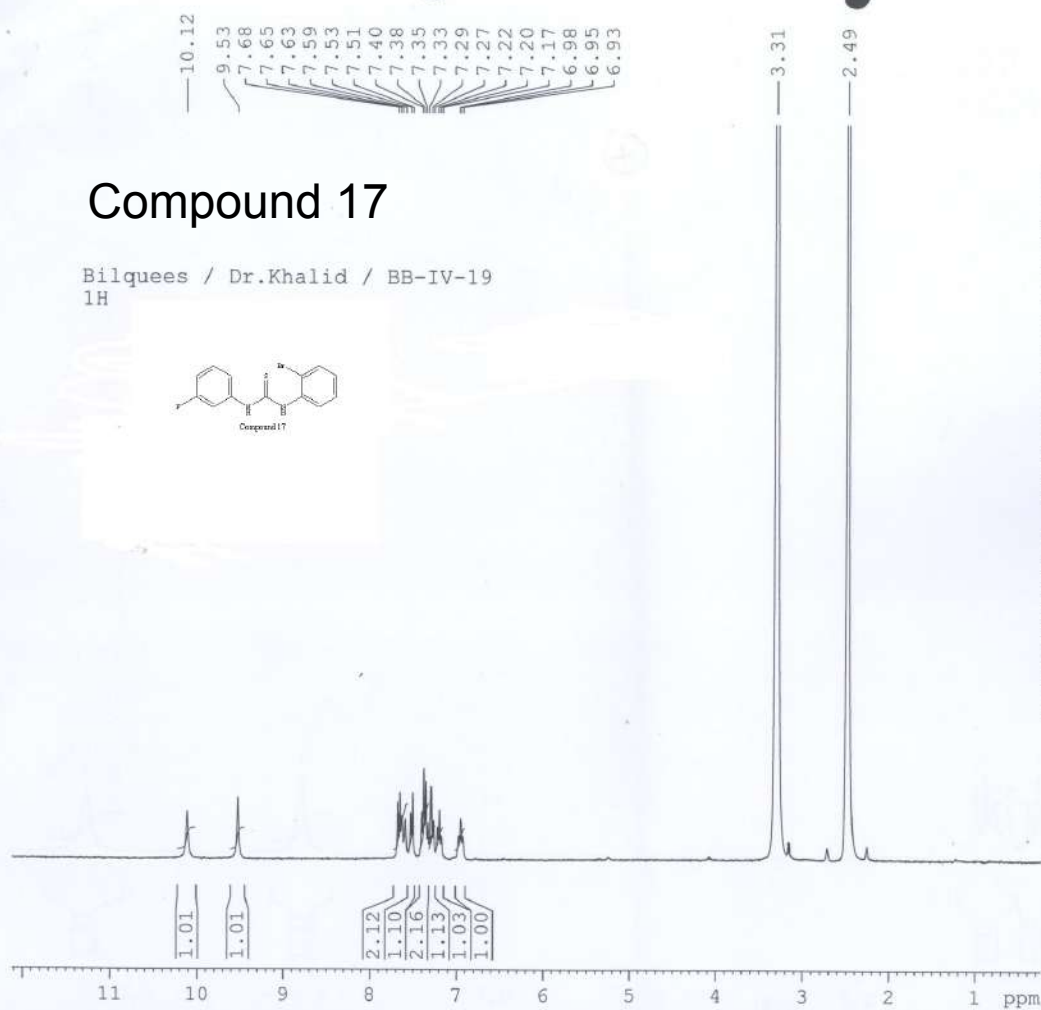

AVANCE AV-300  
LAB NO: 108

NAME june09-15  
EXPNO 7  
PROCNO 1  
Date 20150609  
Time 12.08  
INSTRUM spect  
PROBHD 5 mm DUL 13C-1  
PULPROG zg30  
TD 32768  
SOLVENT DMSO  
NS 64  
DS 0  
SWH 5995.204 Hz  
FIDRES 0.182959 Hz  
AQ 2.7329011 sec  
RG 574.7  
DW 83.400 usec  
DE 6.50 usec  
TE 298.1 K  
DL 2.00000000 sec  
TDO 1

===== CHANNEL f1 =====  
NUC1 1H  
P1 12.30 usec  
PL1 4.00 dB  
SFO1 300.1321009 MHz  
SI 32768  
SF 300.1300041 MHz  
WDW EM  
SSB 0  
LB 0.30 Hz  
GB 0  
PC 0.60

# Compound 18

Bilquees / Dr.Khalid / BB-IV-20  
1H

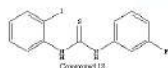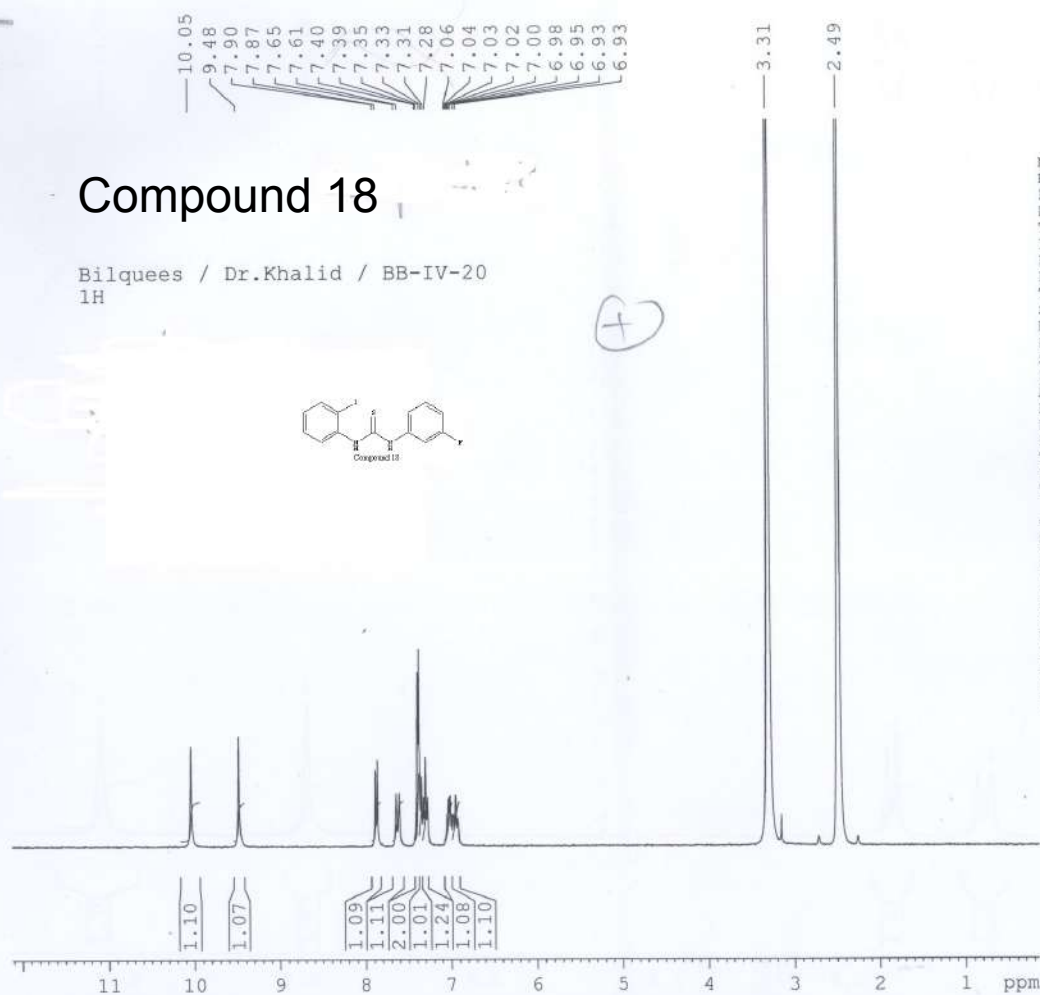

AVANCE AV-300  
LAB NO: 108

NAME june12-15  
EXPNO 3  
PROCNO 1  
Date 20150612  
Time 10.45  
INSTRUM spect  
PROBHD 5 mm DUL 13C-1  
PULPROG zg30  
TD 32768  
SOLVENT DMSO  
NS 32  
DS 0  
SWH 5995.204 Hz  
FIDRES 0.182959 Hz  
AQ 2.7329011 sec  
RG 512  
DW 83.400 usec  
DE 6.50 usec  
TE 298.6 K  
D1 2.00000000 sec  
TD0 1

===== CHANNEL f1 =====  
NUC1 1H  
P1 12.30 usec  
PL1 4.00 dB  
SFO1 300.1321009 MHz  
SI 32768  
SF 300.1300041 MHz  
WDW EM  
SSB 0  
LB 0.30 Hz  
GB 0  
PC 0.60

# Compound 19

BILQUEES/DR.KHALID/BB-IV-25  
1H/

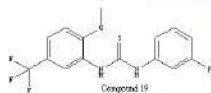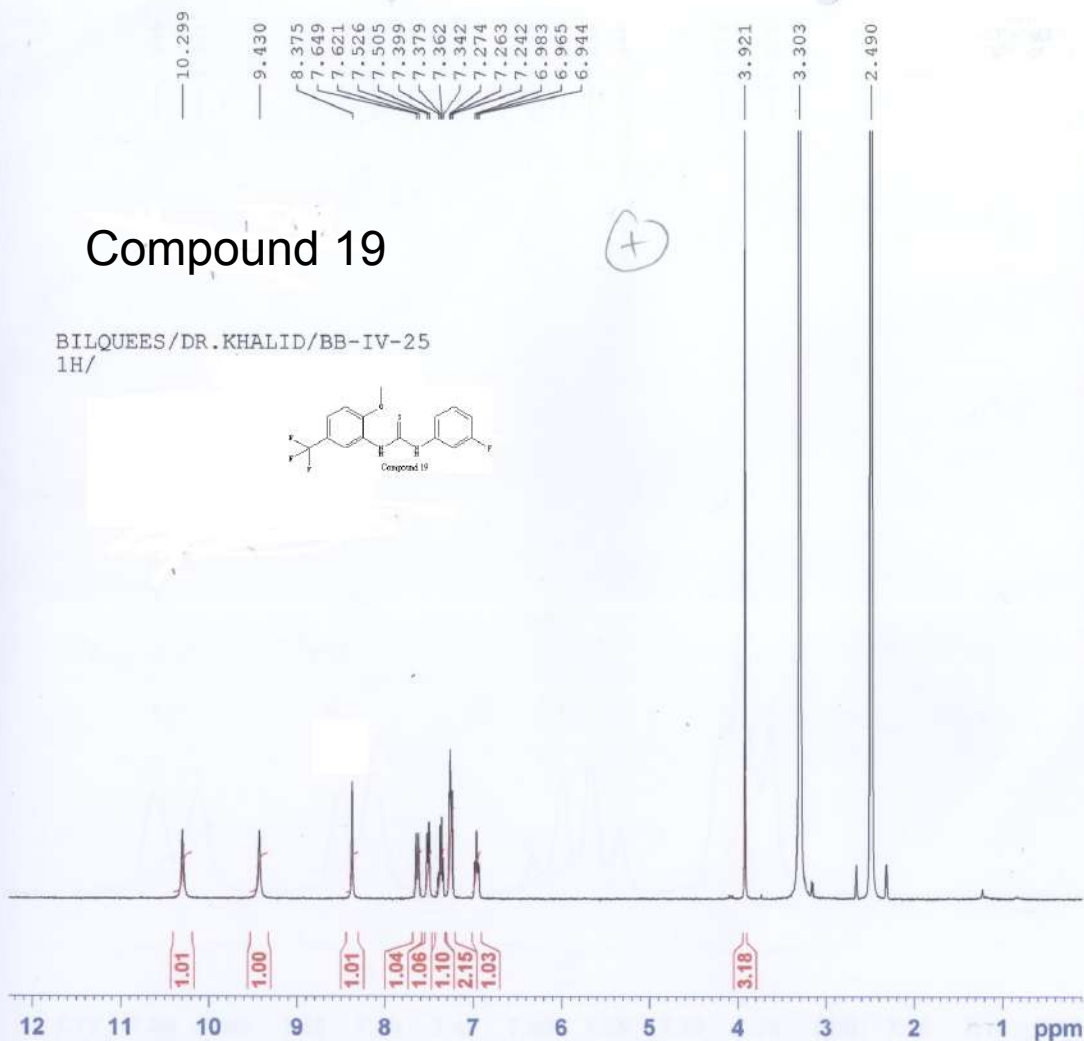

AVANCE AV-400 MHz  
Lab # 115

NAME jun11-15  
EXPNO 3  
PROCNO 1  
Date 20150611  
Time 10.50  
INSTRUM spect  
PROBHD 5 mm SEI 1H-13  
PULPROG zg30  
TD 32768  
SOLVENT DMSO  
NS 64  
DS 0  
SWH 8012.820 Hz  
FIDRES 0.244532 Hz  
AQ 2.0447731 sec  
RG 322.5  
CW 62.400 usec  
DE 6.50 usec  
TE 300.0 K  
D1 2.00000000 sec  
TDO 1

===== CHANNEL f1 =====  
NUC1 1H  
P1 10.80 usec  
PL1 3.00 dB  
SFO1 400.0332002 MHz  
SI 16384  
SF 400.0300041 MHz  
WDW EM  
SSB 0  
LB 0.30 Hz  
GB 0  
PC 1.00

# Compound 20

BILQEES/DR.KHALID/BB.IV.38  
1H/

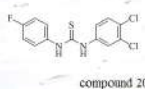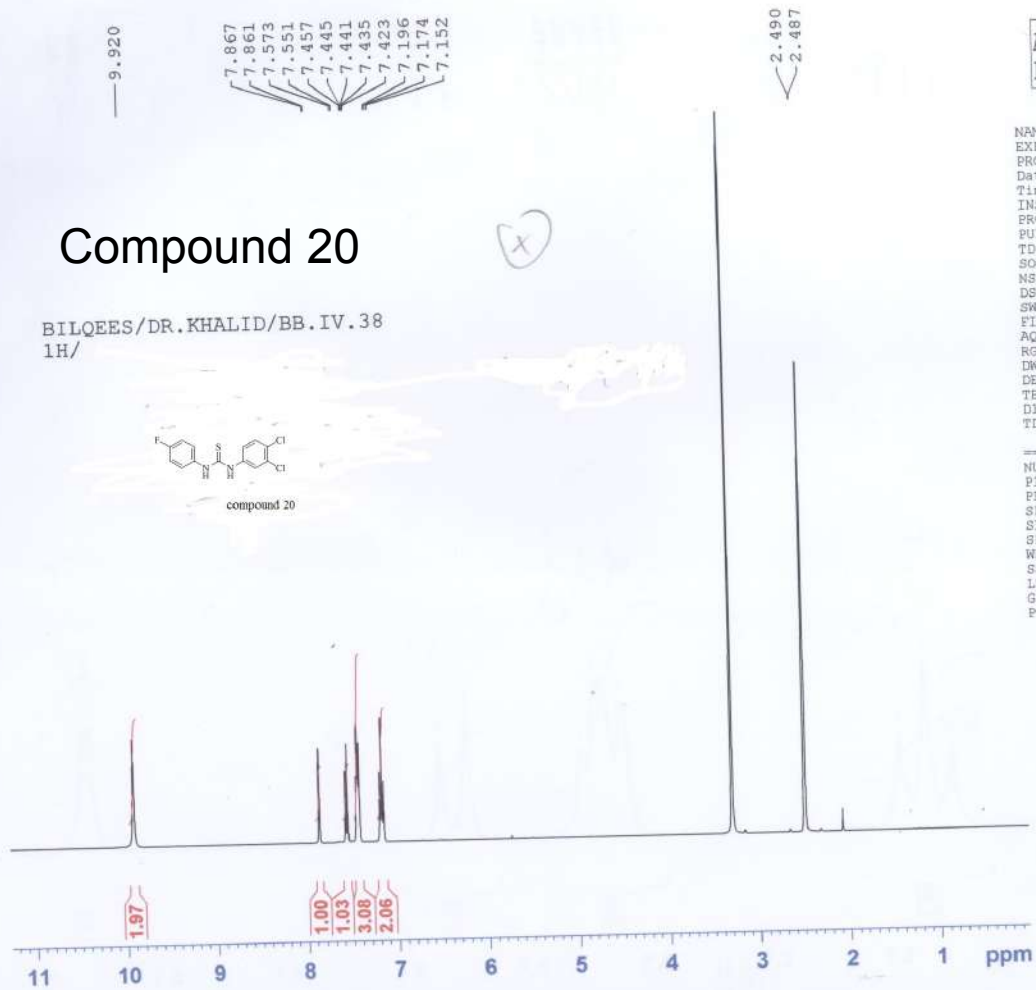

AVANCE AV-400 MHz  
Lab # 115

NAME jun19-15  
EXPNO 11  
PROCNO 1  
Date 20150619  
Time 12.14  
INSTRUM spect  
PROBHD 5 mm SEI 1H-13  
PULPROG zg30  
TD 32768  
SOLVENT DMSO  
NS 64  
DS 0  
SWH 8012.820 Hz  
FIDRES 0.244532 Hz  
AQ 2.0447731 sec  
RG 456.1  
DW 62.400 usec  
DE 6.50 usec  
TE 300.0 K  
D1 2.00000000 sec  
TD0 1

===== CHANNEL f1 =====  
NUC1 1H  
P1 10.80 usec  
PL 3.00 dB  
FL1  
SFO1 400.0332002 MHz  
SI 16384  
SF 400.0300041 MHz  
WDW EM  
SSB 0  
LB 0.30 Hz  
GB 0  
PC 1.00
